# Supplementary material
Source: HighWire-hosted journal article supplement (https://jech.bmj.com/content/77/6/400)

Appendix to:

Widening educational inequalities in mortality in more-recent birth-cohorts: a study of 14 European countries

Journal of Epidemiology and Community Health, 2023

Di Long<sup>1</sup>, Johan P. Mackenbach<sup>1</sup>, Silvia S. Klokgieters<sup>2</sup>, Ramunė Kalėdienė<sup>3</sup>, Patrick Deboosere<sup>4</sup>, Pekka T. Martikainen<sup>5</sup>, Kristian Heggebø<sup>6,7</sup>, Mall Leinsalu<sup>8,9</sup>, Matthias Bopp<sup>10</sup>, Henrik Brønnum-Hansen<sup>11</sup>, Giuseppe Costa<sup>12</sup>, Terje A. Eikemo<sup>6</sup>, Wilma J. Nusselder<sup>1</sup>

Correspondent author:

Di Long

Department of Public Health, Erasmus MC. P.O. Box 2040, 3000 CA Rotterdam

Affiliations:

1. Department of Public health, Erasmus MC, P.O. Box 2040, 3000 CA, Rotterdam, The Netherlands
2. Department of Sociology, Faculty of Social Sciences, Vrije Universiteit, Amsterdam, The Netherlands
3. Department of Health Management, Lithuanian University of Health Sciences, Kaunas, Lithuania
4. Department of Sociology, Vrije Universiteit Brussel, Brussels, Belgium
5. Population Research Unit, Faculty of Social Sciences, University of Helsinki, Helsinki, Finland
6. Department of Sociology and Political Science, Norwegian University of Science and Technology, Trondheim, Norway
7. NOVA, Oslo Metropolitan University
8. Department of Epidemiology and Biostatistics, National Institute for Health Development, Tallinn, Estonia
9. Stockholm Centre for Health and Social Change, Södertörn University, Huddinge, Sweden
10. Epidemiology, Biostatistics and Prevention Institute, University of Zurich, Zurich, Switzerland
11. Department of Public Health, University of Copenhagen, Copenhagen, Denmark
12. Department of Clinical Medicine and Biology, University of Turin, Torino, Italy

*List of tables and figures:*

Table 1. Data sources (Appendix 1)

Table 2. Harmonization of education in the data (Appendix 1)

Table 3. Population and deaths with missing education (Appendix 1)

Table 4. Percentage of deaths with low education in each cohort (Appendix 1)

Table 5. Birth-cohort included in the analysis (Appendix 2)

Table 6. ICD code numbers for the causes of death included in the analysis (Appendix 3)

Figure 1. Changes in eight cause-specific mortality among the high-educated by sex and birth-year (Appendix 6)

Figure 2. Changes in eight cause-specific mortality among the low-educated by sex and birth-year (Appendix 6)

Figure 3. Change in mortality by birth-year: using a common standard population for both male and female (Appendix 7)

Figure 4. Changes in inequalities in all-cause mortality by period and cohort perspectives: using a common standard population for both male and female (Appendix 7)

## Appendix 1

Table 1. Data sources

| Country        | Type         | Years                           | Length of follow-up (years) | Geographic coverage | Inclusion                 |
|----------------|--------------|---------------------------------|-----------------------------|---------------------|---------------------------|
| Austria        | Longitudinal | May 12, 1981 – May 11, 1982     | 1                           | National            | All population groups     |
|                |              | May 15, 1991 – May 14, 1992     | 1                           | National            | All population groups     |
|                |              | May 15, 2001 – May 14, 2002     | 1                           | National            | All population groups     |
|                |              | Oct 31, 2011 – Oct 31 2013      | 2                           | National            | All population groups     |
| Belgium        | Longitudinal | March 1, 1991 – Dec 31, 1997    | 6y, 10m                     | National            | All population groups     |
|                |              | Oct 1, 2001 – Dec 31, 2011      | 10y, 3m                     | National            | All population groups     |
| Denmark        | Longitudinal | Jan 1, 1995- Dec 31, 1999       | 5                           | National            | All population groups     |
|                |              | Jan 1, 2000- Dec 31, 2004       | 5                           | National            | All population groups     |
|                |              | Jan 1, 2005- Dec 31, 2009       | 5                           | National            | All population groups     |
|                |              | Jan 1, 2010- Dec 31, 2014       | 5                           | National            | All population groups     |
| England/ Wales | Longitudinal | April 25, 1971 – April 4, 1981  | 10                          | National            | 1% representative sample  |
|                |              | April 5, 1981 – April 20, 1991  | 10                          | National            | 1% representative sample  |
|                |              | April 21, 1991 – April 28, 2001 | 10                          | National            | 1% representative sample  |
|                |              | April 29, 2001 – Dec 31, 2009   | 8.7                         | National            | 1% representative sample  |
|                |              | April 2001 – March 2011         | 10                          | National            | 1% representative sample  |
|                |              | March 2011 – Dec 2013           | 2y, 10m                     | National            | 1% representative sample  |
| Estonia        | Longitudinal | 2001 – 2011                     | 10y, 3m                     | National            | All population groups     |
|                |              | 2012 – 2015                     | 4                           | National            | All population groups     |
| Finland        | Longitudinal | Dec 31, 1970 – Dec 31, 1980     | 10                          | National            | All population groups     |
|                |              | Dec 31, 1980 – Dec 31, 1990     | 10                          | National            | All population groups     |
|                |              | Dec 31, 1990 – Dec 31, 2000     | 10                          | National            | All population groups     |
|                |              | Dec 31, 2000 – Dec 31, 2010     | 10                          | National            | All population groups     |
|                |              | Dec 31, 2010 – Dec 31, 2014     | 4                           | National            | 80% representative sample |
| France         | Longitudinal | Jan 10, 1975 – Jan 9, 1982      | 7                           | National            | 1% representative sample  |
|                |              | Jan 10, 1982 – Jan 9, 1990      | 8                           | National            | 1% representative sample  |
|                |              | Jan 10, 1990 – Jan 9, 1999      | 9                           | National            | 1% representative sample  |
|                |              | Jan 10, 1999 – Dec 31, 2007     | 9                           | National            | 1% representative sample  |
| Hungary        | CS, unlinked | 1971 – 1974                     | 4                           | National            | All population groups     |
|                |              | 1978 – 1981                     | 4                           | National            | All population groups     |
|                |              | 1988 – 1991                     | 4                           | National            | All population groups     |
|                |              | 1999 – 2002                     | 4                           | National            | All population groups     |
|                |              | 2010 – 2012                     | 3                           | National            | All population groups     |
| Italy, Turin   | Longitudinal | Oct 24, 1971 – Oct 24, 1981     | 10                          | City                | All population groups     |
|                |              | Oct 25, 1981 – Oct 19, 1991     | 10                          | City                | All population groups     |
|                |              | Oct 20, 1991 – Oct 20, 2001     | 10                          | City                | All population groups     |
|                |              | Oct 21, 2001 – Dec 31, 2010     | 9.2                         | City                | All population groups     |
|                |              | Oct 21, 2001 – Oct 9, 2011      | 10                          | City                | All population groups     |
|                |              | Oct 10, 2011 – Dec 12, 2013     | 2y, 3m                      | City                | All population groups     |

|                  |              |                              |     |          |                       |
|------------------|--------------|------------------------------|-----|----------|-----------------------|
| Lithuania        | Longitudinal | Apr 6, 2001 – Dec 12, 2009   | 8.8 | National | All population groups |
|                  |              | March 1, 2011 – Dec 31, 2014 | 4   | National | All population groups |
| Norway           | Longitudinal | Nov 1970 – Dec 1980          | 10  | National | All population groups |
|                  |              | Nov 1980 – Dec 1990          | 10  | National | All population groups |
|                  |              | Nov 1990 – Dec 2001          | 11  | National | All population groups |
|                  |              | Nov 2001 – Dec 2009          | 8   | National | All population groups |
| Spain, Barcelona | CS, repeated | 1992 – 1996                  | 5   | City     | All population groups |
|                  |              | 1997 – 2001                  | 5   | City     | All population groups |
|                  |              | 2002 – 2006                  | 5   | City     | All population groups |
|                  |              | 2007 – 2010                  | 4   | City     | All population groups |
|                  |              | 2011 – 2013                  | 3   | City     | All population groups |
| Sweden           | Longitudinal | Jan 1990 – Dec 1999          | 10  | National | All population groups |
|                  |              | Jan 2000 – Dec 2008          | 9   | National | All population groups |
| Switzerland      | Longitudinal | Dec 4, 1990 – Dec 5, 2000    | 10  | National | Swiss nationals       |
|                  |              | Dec 31, 2000 – Dec 31, 2010  | 10  | National | Swiss nationals       |
|                  |              | Dec 31, 2010 – Dec 31, 2014  | 4   | National | Swiss nationals       |

Note to table 1: CS = cross-sectional

Table 2. Harmonization of education in the data

| Country                          | Label in original dataset |                                                                                                | ISCED level | 3-level education classification used in this analysis | Comments |
|----------------------------------|---------------------------|------------------------------------------------------------------------------------------------|-------------|--------------------------------------------------------|----------|
| Austria (< 2001)                 | 1                         | Compulsory schooling (in German: Pflichtschule)                                                | 0-2         | 1                                                      |          |
|                                  | 2                         | Apprenticeship (Lehre)                                                                         | 3           | 2                                                      |          |
|                                  | 3                         | Intermediate technical and vocational school (Fachschule ohne Matura)                          | 3           | 2                                                      |          |
|                                  | 4                         | Academic secondary school, higher technical and vocational college (Höhere Schule mit Matura)  | 3-4         | 2                                                      |          |
|                                  | 5                         | University, Fachhochschule, post-secondary college (Hochschule, hochschulverwandte Ausbildung) | 5-6         | 3                                                      |          |
| Austria, 2001 – 2002; 2011- 2013 | 1                         | ISCED 0-2                                                                                      | 0-2         | 1                                                      |          |
|                                  | 2                         | ISCED 3                                                                                        | 3           | 2                                                      |          |
|                                  | 3                         | ISCED 4                                                                                        | 4           | 2                                                      |          |
|                                  | 4                         | ISCED 5-6                                                                                      | 5-6         | 3                                                      |          |
| Belgium, 1991–1997               | 1                         | ISCED 0                                                                                        | 0           | 1                                                      |          |
|                                  | 2                         | ISCED 1                                                                                        | 1           | 1                                                      |          |
|                                  | 3                         | ISCED 2                                                                                        | 2           | 1                                                      |          |

|                                      |    |                                                                |         |    |                                                                                                                                  |
|--------------------------------------|----|----------------------------------------------------------------|---------|----|----------------------------------------------------------------------------------------------------------------------------------|
|                                      | 4  | ISCED 3                                                        | 3       | 2  |                                                                                                                                  |
|                                      | 5  | ISCED 5                                                        | 5       | 3  |                                                                                                                                  |
| Belgium, 2001-2011                   | 1  | ISCED 0                                                        | 0       | 1  |                                                                                                                                  |
|                                      | 2  | ISCED 1                                                        | 1       | 1  |                                                                                                                                  |
|                                      | 3  | ISCED 2                                                        | 2       | 1  |                                                                                                                                  |
|                                      | 4  | ISCED 3                                                        | 3       | 2  |                                                                                                                                  |
|                                      | 5  | ISCED 4                                                        | 4       | 2  |                                                                                                                                  |
|                                      | 6  | ISCED 5                                                        | 5       | 3  |                                                                                                                                  |
|                                      | 7  | ISCED 6                                                        | 6       | 3  |                                                                                                                                  |
| Czech Republic, all periods          | 1  | Basic and incomplete or without education ISCED=1+2A+2B        | 1-2     | 1  | For comparability with other Central and Eastern European countries, vocational education was coded as lower secondary education |
|                                      | 2  | Lower Secondary ISCED=3C                                       | 3C      | 1  |                                                                                                                                  |
|                                      | 3  | Upper secondary ISCED=3A+3B+4                                  | 3A-3B-4 | 2  |                                                                                                                                  |
|                                      | 4  | University ISCED=5+                                            | 5-6     | 3  |                                                                                                                                  |
| Denmark: All periods                 |    | ISCED0-1                                                       | 0-1     | 1  |                                                                                                                                  |
|                                      |    | ISCED2                                                         | 2       | 1  |                                                                                                                                  |
|                                      |    | ISCED3-4                                                       | 3-4     | 2  |                                                                                                                                  |
|                                      |    | ISCED0-5-6                                                     | 4-6     | 3  |                                                                                                                                  |
| England/ Wales, 1971-1981            | -1 | Missing/none stated                                            | -1      | -1 |                                                                                                                                  |
|                                      | 1  | No qualification                                               | 0-2     | 1  |                                                                                                                                  |
|                                      | 2  | A-level and equivalent                                         | 3       | 1  |                                                                                                                                  |
|                                      | 3  | Qualification higher than A-level but below first degree level | 4       | 3  |                                                                                                                                  |
|                                      | 4  | First degree level or equivalent                               | 5       | 3  |                                                                                                                                  |
|                                      | 5  | Higher degree level or equivalent                              | 5       | 3  |                                                                                                                                  |
| England/ Wales, 1981-1991; 1991-2001 | -1 | Missing/not stated                                             | -1      | -1 |                                                                                                                                  |
|                                      | 1  | No qualifications                                              | 0-3     | 1  |                                                                                                                                  |
|                                      | 2  | Qualification higher than A-level but below first degree level | 4       | 3  |                                                                                                                                  |
|                                      | 3  | First degree level or equivalent                               | 5       | 3  |                                                                                                                                  |
|                                      | 4  | Higher degree level or equivalent                              | 5       | 3  |                                                                                                                                  |
|                                      | -1 | Missing/not applicable/none stated                             | -1      | -1 |                                                                                                                                  |
|                                      | 0  | No qualifications                                              | 0-1     | 1  |                                                                                                                                  |

|                                  |    |                                                                                                                                                                                                                                                                   |     |    |  |
|----------------------------------|----|-------------------------------------------------------------------------------------------------------------------------------------------------------------------------------------------------------------------------------------------------------------------|-----|----|--|
| England/<br>Wales, 2001-<br>2009 | 1  | CSEs (grades 2-5), GCSEs (grades D-G), 1-4 CSEs (grade 1), 1-4 GCSEs (grades A-C), 1-4 O levels, NVQ level 1, Foundation GNVQ                                                                                                                                     | 2   | 1  |  |
|                                  | 2  | 5+O levels, 5+CSEs (grade1), 5+GCSEs (grades A-C) etc, 1 A level, 1-3 AS levels, NVQ level 2, Intermediate GNVQ                                                                                                                                                   | 3C  | 1  |  |
|                                  | 3  | 2+ A levels, 4+ AS levels, Higher School Certificate, NVQ level 3, Advanced GNVQ                                                                                                                                                                                  | 3AB | 1  |  |
|                                  | 4  | First degree, Higher degree, NVQ levels 4-5, HNC, HND, Qualified Teacher status, Qualified Medical Doctor, Qualified Dentist, Qualified Nurse, Midwife, Health Visitor                                                                                            | 5-6 | 3  |  |
|                                  | 5  | Other qualifications/ level unknown: Other qualifications (eg City and Guilds etc), Other Professional qualifications                                                                                                                                             | -1  | -1 |  |
| England Wales,<br>2011-2013      | -1 | Missing/not applicable                                                                                                                                                                                                                                            | -1  | -1 |  |
|                                  | 0  | No qualifications                                                                                                                                                                                                                                                 | 0-1 | 1  |  |
|                                  | 1  | Level 1: 1-4 O Levels/CSE/GCSEs (any grades), Entry Level, Foundation Diploma, NVQ level 1, Foundation GNVQ, Basic/Essential Skills (England & Wales & Northern Ireland)                                                                                          | 2   | 1  |  |
|                                  | 2  | Level 2: 5+ O Level (Passes)/CSEs (Grade 1)/GCSEs (Grades A*-C), School Certificate, 1 A Level/ 2-3 AS Levels/VCEs, Intermediate/Higher Diploma, Welsh Baccalaureate, Intermediate Diploma, NVQ level 2, Intermediate GNVQ, City and Guilds Craft, BTEC First/G   | 3C  | 1  |  |
|                                  | 3  | Level 3: 2+ A Levels/VCEs, 4+ AS Levels, Higher School Certificate, Progression/Advanced Diploma, Welsh Baccalaureate Advance Diploma, NVQ Level 3; Advanced GNVQ, City and Guilds Advanced Craft, ONC, OND, BTEC National, RSA Advanced Diploma (England & Wales | 3AB | 1  |  |
|                                  | 4  | Level 4+: Degree (BA, BSc), Higher Degree (MA, PhD, PGCE), NVQ Level 4-5, HNC, HND, RSA Higher Diploma, BTEC Higher level, Foundation degree (NI), Professional, Qualifications (Teaching, Nursing, Accountancy) (England & Wales & Northern Ireland)             | 5-6 | 3  |  |
|                                  | 5  | Apprenticeship (England & Wales & Northern Ireland) or Other: Vocational/Work-related Qualifications, Foreign Qualifications/ Qualifications gained outside the UK (NI) (Not stated/ level unknown) (England & Wales & Northern Ireland)                          | -1  | -1 |  |
|                                  | -1 | Missing                                                                                                                                                                                                                                                           | -1  |    |  |
|                                  | 1  | Primary (ISCED11=1)                                                                                                                                                                                                                                               | 1   | 1  |  |

|                               |    |                                                                              |       |    |                                                                                                                                  |
|-------------------------------|----|------------------------------------------------------------------------------|-------|----|----------------------------------------------------------------------------------------------------------------------------------|
| Estonia 2001-2011, 2012-2015  | 2  | Lower secondary (24, 25)                                                     | 2     | 1  |                                                                                                                                  |
|                               | 3  | Upper secondary (34, 35)                                                     | 3     | 2  |                                                                                                                                  |
|                               | 4  | Post sec non-tertiary (4)                                                    | 4     | 2  |                                                                                                                                  |
|                               | 5  | Secondary specialized (5)                                                    | 3     | 2  |                                                                                                                                  |
|                               | 6  | First stage tertiary (6, 7)                                                  | 5     | 3  |                                                                                                                                  |
|                               | 7  | Second stage tertiary (8)                                                    | 6     | 3  |                                                                                                                                  |
| Finland, all periods          | 1  | ISCED levels 0-2 or education level unknown                                  | 0-2   | 1  | Post-secondary education (ISCED 4-6) is assumed to be comparable to tertiary education                                           |
|                               | 2  | ISCED levels 3                                                               | 3     | 2  |                                                                                                                                  |
|                               | 3  | ISCED levels 4-6                                                             | 4-6   | 3  |                                                                                                                                  |
| France                        | -1 | Missing                                                                      | -     | -1 |                                                                                                                                  |
|                               | 1  | ISCED 0-1: primary level (no diploma or CEP)                                 | 0-1   | 1  |                                                                                                                                  |
|                               | 2  | ISCED 2 (BEPC)                                                               | 2     | 1  |                                                                                                                                  |
|                               | 3  | ISCED 3C (CAP or BEP)                                                        | 3C    | 2  |                                                                                                                                  |
|                               | 4  | ISCED 3AB (Baccalauréat)                                                     | 3A-3B | 2  |                                                                                                                                  |
|                               | 5  | ISCED 5-6                                                                    | 5-6   | 3  |                                                                                                                                  |
| Hungary, 1971-1974, 1978-1981 | 2  | Less than elementary                                                         | 0     | 1  | For comparability with other Central and Eastern European countries, vocational education was coded as lower secondary education |
|                               | 3  | Elementary                                                                   | 1     | 1  |                                                                                                                                  |
|                               | 4  | Vocational training                                                          | 3C    | 1  |                                                                                                                                  |
|                               | 5  | Maturation                                                                   | 3A-3B | 2  |                                                                                                                                  |
|                               | 6  | Tertiary education                                                           | 5-6   | 3  |                                                                                                                                  |
|                               | 9  | Missing                                                                      | -1    | -1 |                                                                                                                                  |
| Hungary, 1988-1991, 1999-2002 | 1  | less than 6 classes                                                          | 0     | 1  | For comparability with other Central and Eastern European countries, vocational education was coded as lower secondary education |
|                               | 2  | 6 (or 7) classes                                                             | 1     | 1  |                                                                                                                                  |
|                               | 3  | 8 classes                                                                    | 1     | 1  |                                                                                                                                  |
|                               | 4  | vocational training without maturation (9, 10 or most frequently 11 classes) | 3C    | 1  |                                                                                                                                  |
|                               | 5  | maturation with or without vocation training                                 | 3A-3B | 2  |                                                                                                                                  |
|                               | 6  | Tertiary                                                                     | 5-6   | 3  |                                                                                                                                  |
|                               | 9  | Unknown                                                                      | -1    | -1 |                                                                                                                                  |
| Hungary 2010-2012             | 1  | No or only primary education (ISCED 0+1)                                     | 1     | 1  |                                                                                                                                  |
|                               | 2  | Lower secondary (ISCED 2)                                                    | 2     | 1  |                                                                                                                                  |

|                                     |    |                                                                                                                                                                    |     |    |  |
|-------------------------------------|----|--------------------------------------------------------------------------------------------------------------------------------------------------------------------|-----|----|--|
|                                     | 3  | Upper secondary and post-secondary non-tertiary (ISCED 3+4)                                                                                                        | 3-4 | 2  |  |
|                                     | 4  | Tertiary education (ISCED 5+6)                                                                                                                                     | 5-6 | 3  |  |
| Italy (Turin), all periods          | -1 | Unknown (no cases)                                                                                                                                                 | -   |    |  |
|                                     | 1  | ISCED level 0                                                                                                                                                      | 0   | 1  |  |
|                                     | 2  | ISCED level 1 (5 years completed, "licenza elementare")                                                                                                            | 1   | 1  |  |
|                                     | 3  | ISCED level 2 (2-3 years, following level 1, corresponding to "licenza avviamento professionale" in the old system (up to 1963) and "licenza media inferiore" now) | 2   | 1  |  |
|                                     | 4  | ISCED level 3C (2-3 years courses, following level 2, corresponding to "diploma scuola professionale")                                                             | 3C  | 2  |  |
|                                     | 5  | ISCED level 3AB (4-5 years courses, following level 2, corresponding to "diploma scuola media superiore")                                                          | 3AB | 2  |  |
|                                     | 6  | ISCED level 5 (2-3 years, following a 5 year course of level 3AB, "diploma universitario")                                                                         | 5   | 3  |  |
|                                     | 7  | ISCED level 6 (4-6 years university degree ("laurea") following a 5 year course of level 3AB, and upper research qualifications, following "laurea")               | 6   | 3  |  |
|                                     |    |                                                                                                                                                                    |     |    |  |
| Lithuania, 2001 – 2009<br>2011-2014 | -1 | Missing                                                                                                                                                            | -   | -1 |  |
|                                     | 1  | Pre-primary education or no education at all                                                                                                                       | 0   | 1  |  |
|                                     | 2  | Primary education                                                                                                                                                  | 1   | 1  |  |
|                                     | 3  | Lower secondary (basic education, with or without some vocational ed.)                                                                                             | 2   | 1  |  |
|                                     | 4  | Upper secondary (secondary with or without some vocational ed.)                                                                                                    | 3   | 2  |  |
|                                     | 5  | Post-secondary non-tertiary (special secondary with vocational ed., college, incomplete university)                                                                | 4   | 2  |  |
|                                     | 6  | Tertiary                                                                                                                                                           | 5-6 | 3  |  |
| Norway, all periods                 | 0  | ISCED 0                                                                                                                                                            | 0   | 1  |  |
|                                     | 1  | ISCED 1                                                                                                                                                            | 1   | 1  |  |
|                                     | 2  | ISCED 2                                                                                                                                                            | 2   | 1  |  |
|                                     | 3  | ISCED 3                                                                                                                                                            | 3   | 2  |  |
|                                     | 4  | ISCED 4                                                                                                                                                            | 4   | 2  |  |
|                                     | 5  | ISCED 5                                                                                                                                                            | 5   | 3  |  |
|                                     | 6  | ISCED 6                                                                                                                                                            | 6   | 3  |  |
|                                     | -1 | Unknown                                                                                                                                                            | -   | -1 |  |



|                                      |    |                                                    |       |    |                                                                                              |
|--------------------------------------|----|----------------------------------------------------|-------|----|----------------------------------------------------------------------------------------------|
| Spain<br>(Barcelona), all<br>periods | 1  | No education at all                                | 0     | 1  |                                                                                              |
|                                      | 2  | First stage of basic education, basic primary      | 1     | 1  |                                                                                              |
|                                      | 3  | Second stage of basic education, primary completed | 2     | 1  |                                                                                              |
|                                      | 4  | Secondary education                                | 3     | 2  |                                                                                              |
|                                      | 5  | Tertiary education, university                     | 5-6   | 3  |                                                                                              |
| Sweden, all<br>periods               | 1  | First stage of basic education                     | 0-1   | 1  | Post-secondary education (ISCED 4-6) is<br>assumed to be comparable to tertiary<br>education |
|                                      | 2  | Second stage of basic education                    | 2     | 1  |                                                                                              |
|                                      | 3  | Secondary education                                | 3     | 2  |                                                                                              |
|                                      | 4  | Post-secondary education                           | 4-6   | 3  |                                                                                              |
| Switzerland, all<br>periods          | -1 | No information                                     | -     | -1 |                                                                                              |
|                                      | 1  | ISCED=1 No education completed                     | 1     | 1  |                                                                                              |
|                                      | 2  | ISCED=2 Mandatory education                        | 2     | 1  |                                                                                              |
|                                      | 3  | ISCED=3 Upper secondary general                    | 3A-3B | 2  |                                                                                              |
|                                      | 4  | ISCED=3 Upper secondary vocational                 | 3C    | 2  |                                                                                              |
|                                      | 5  | ISCED=5 Tertiary education                         | 5     | 3  |                                                                                              |
|                                      | -1 | No information                                     |       |    |                                                                                              |
|                                      | 1  | ISCED97 0+1                                        | 0-1   | 1  |                                                                                              |
|                                      | 2  | ISCED97 2                                          | 2     | 1  |                                                                                              |
|                                      | 3  | ISCED97 3                                          | 3     | 2  |                                                                                              |
|                                      | 4  | ISCED97 5+6                                        | 5-6   | 3  |                                                                                              |
|                                      |    |                                                    |       |    |                                                                                              |

Table 3. Population and deaths with missing education in the dataset

|         | Number of person-years with missing education (%) | Number of deaths with missing education (%) |
|---------|---------------------------------------------------|---------------------------------------------|
| Austria | 0                                                 | 0                                           |
| Belgium | 8.1                                               | 13.7                                        |
| Denmark | 2.3                                               | 2.8                                         |

|                      |     |      |
|----------------------|-----|------|
| UK (England & Wales) | 6.4 | 9.8  |
| Estonia              | 0.5 | 1.0  |
| Hungary              | 0   | 2.2  |
| Italy (Turin)        | 0.6 | 0.6  |
| Lithuania            | 0.7 | 2.2  |
| Sweden               | 3.1 | 15.4 |
| Finland              | 0   | 0    |
| Switzerland          | 3.6 | 13.6 |
| France               | 0   | 0    |
| Norway               | 1.0 | 2.2  |
| Spain (Barcelona)    | 0.4 | 6.2  |

Table 4. Percentage of deaths with low education in each cohort

| Country         | Sex   | Percentage of deaths with low education in each cohort (%) |           |           |           |           |           |           |           |           |           |           |           |           |           |
|-----------------|-------|------------------------------------------------------------|-----------|-----------|-----------|-----------|-----------|-----------|-----------|-----------|-----------|-----------|-----------|-----------|-----------|
|                 |       | 1902-1910                                                  | 1907-1915 | 1912-1925 | 1917-1925 | 1922-1930 | 1927-1935 | 1932-1940 | 1937-1945 | 1942-1950 | 1947-1950 | 1952-1960 | 1957-1965 | 1962-1970 | 1967-1975 |
| Austria         | Males |                                                            |           |           |           | 45        | 43        | 42        | 33        | 26        | 26        | 25        | 22        |           |           |
| Belgium         | Males |                                                            |           |           |           |           | 77        | 73        | 67        | 62        | 58        | 56        | 52        |           |           |
| Denmark         | Males |                                                            |           |           |           |           | 53        | 47        | 44        | 39        | 36        | 40        | 45        | 47        | 48        |
| England & Wales | Males | 96                                                         | 96        | 94        | 93        | 92        | 90        | 88        | 87        | 85        | 83        | 81        | 85        | 81        |           |
| Estonia         | Males |                                                            |           |           |           |           |           | 56        | 52        | 45        | 37        | 29        | 21        | 18        | 24        |
| Finland         | Males | 88                                                         | 86        | 84        | 82        | 81        | 77        | 69        | 60        | 52        | 46        | 37        | 34        | 36        | 39        |
| France          | Males |                                                            | 89        | 86        | 83        | 81        | 75        | 69        | 60        | 49        | 48        | 42        | 46        |           |           |

|                   |         |    |    |    |    |    |    |    |    |    |    |    |    |    |    |
|-------------------|---------|----|----|----|----|----|----|----|----|----|----|----|----|----|----|
| Hungary           | Males   |    | 89 | 86 | 84 | 83 | 82 | 82 | 79 | 77 | 79 | 81 |    |    |    |
| Italy (Turin)     | Males   | 89 | 88 | 85 | 83 | 82 | 82 | 81 | 74 | 68 | 63 | 63 | 59 | 57 |    |
| Lithuania         | Males   |    |    |    |    |    |    | 66 | 58 | 45 | 29 | 20 | 15 | 16 | 21 |
| Norway            | Males   | 66 | 64 | 60 | 55 | 52 | 48 | 46 | 40 | 35 | 35 | 37 |    |    |    |
| Spain (Barcelona) | Males   |    |    |    |    | 78 | 76 | 73 | 68 | 65 | 60 | 57 | 64 | 63 | 62 |
| Sweden            | Males   |    |    |    |    | 63 | 60 | 55 | 49 | 42 | 38 | 36 | 32 |    |    |
| Switzerland       | Males   |    |    |    |    | 39 | 33 | 29 | 25 | 23 | 22 | 21 | 20 | 19 | 17 |
| Austria           | Females |    |    |    |    | 72 |    | 68 | 56 | 43 | 44 | 40 | 36 |    |    |
| Belgium           | Females |    |    |    |    |    | 83 | 77 | 71 | 64 | 58 | 54 | 47 |    |    |
| Denmark           | Females |    |    |    |    |    | 71 | 66 | 59 | 51 | 45 | 47 | 44 | 42 | 38 |
| England & Wales   | Females | 97 | 97 | 96 | 96 | 95 | 93 | 90 | 91 | 87 | 84 | 81 | 81 | 85 |    |
| Estonia           | Females |    |    |    |    |    |    | 51 | 41 | 32 | 25 | 18 | 14 | 16 | 18 |
| Finland           | Females | 91 | 89 | 87 | 84 | 82 | 78 | 70 | 60 | 51 | 44 | 36 | 29 | 29 | 31 |
| France            | Females |    | 95 |    | 90 | 88 | 84 | 82 | 71 | 63 | 54 | 51 |    |    |    |
| Hungary           | Females |    | 95 | 93 | 92 | 90 | 85 | 80 | 72 | 66 | 66 | 68 |    |    |    |
| Italy (Turin)     | Females | 94 | 95 | 93 | 91 | 88 | 87 | 85 | 81 | 73 | 64 | 55 | 52 |    |    |
| Lithuania         | Females |    |    |    |    |    |    | 67 | 54 | 38 | 22 | 14 | 9  | 11 | 14 |
| Norway            | Females | 74 | 74 | 70 | 66 | 62 | 58 | 53 | 45 | 38 | 37 | 39 |    |    |    |
| Spain (Barcelona) | Females |    |    |    |    | 89 | 87 | 84 | 77 | 70 | 62 | 55 | 53 | 54 | 55 |
| Sweden            | Females |    |    |    |    | 70 | 64 | 56 | 47 | 38 | 33 | 30 | 27 |    |    |
| Switzerland       | Females |    |    |    |    | 64 | 59 | 52 | 45 | 40 | 36 | 34 | 32 | 27 | 23 |

Note to table: In this table we used a common label for the birth-cohorts. The exact label for each cohort can be found in Appendix 2 Table 5

Appendix 2

Table 5. Birth-cohorts included in the analysis

| Country | Sex     | Birth- cohort | Min age group | Max age group | Number of age groups | Age category |
|---------|---------|---------------|---------------|---------------|----------------------|--------------|--------------|--------------|--------------|--------------|--------------|--------------|--------------|--------------|--------------|
| Austria | Males   | 1922-1927     | 55-59         | 75-79         | 3                    |              |              |              |              |              | 55-59        |              | 65-69        |              | 75-79        |
| Austria | Males   | 1927-1932     | 50-54         | 70-74         | 3                    |              |              |              |              | 50-54        |              | 60-64        |              | 70-74        |              |
| Austria | Males   | 1932-1937     | 45-49         | 75-79         | 4                    |              |              |              | 45-49        |              | 55-59        |              | 65-69        |              | 75-79        |
| Austria | Males   | 1937-1942     | 40-44         | 70-74         | 4                    |              |              | 40-44        |              | 50-54        |              | 60-64        |              | 70-74        |              |
| Austria | Males   | 1942-1947     | 35-39         | 65-69         | 4                    |              | 35-39        |              | 45-49        |              | 55-59        |              | 65-69        |              |              |
| Austria | Males   | 1947-1952     | 30-34         | 60-64         | 4                    | 30-34        |              | 40-44        |              | 50-54        |              | 60-64        |              |              |              |
| Austria | Males   | 1952-1957     | 35-39         | 55-59         | 3                    |              | 35-39        |              | 45-49        |              | 55-59        |              |              |              |              |
| Austria | Males   | 1957-1962     | 30-34         | 50-54         | 3                    | 30-34        |              | 40-44        |              | 50-54        |              |              |              |              |              |
| Austria | Females | 1922-1927     | 55-59         | 75-79         | 3                    |              |              |              |              |              | 55-59        |              | 65-69        |              | 75-79        |
| Austria | Females | 1932-1937     | 55-59         | 75-79         | 3                    |              |              |              |              |              | 55-59        |              | 65-69        |              | 75-79        |
| Austria | Females | 1937-1942     | 50-54         | 70-74         | 3                    |              |              |              |              | 50-54        |              | 60-64        |              | 70-74        |              |
| Austria | Females | 1942-1947     | 45-49         | 65-69         | 3                    |              |              |              | 45-49        |              | 55-59        |              | 65-69        |              |              |
| Austria | Females | 1947-1952     | 40-44         | 60-64         | 3                    |              |              | 40-44        |              | 50-54        |              | 60-64        |              |              |              |
| Austria | Females | 1952-1957     | 35-39         | 55-59         | 3                    |              | 35-39        |              | 45-49        |              | 55-59        |              |              |              |              |
| Austria | Females | 1957-1962     | 30-34         | 50-54         | 3                    | 30-34        |              | 40-44        |              | 50-54        |              |              |              |              |              |
| Belgium | Males   | 1927-1936     | 60-64         | 75-79         | 3                    |              |              |              |              |              |              | 60-64        |              | 70-74        | 75-79        |
| Belgium | Males   | 1932-1941     | 55-59         | 70-74         | 3                    |              |              |              |              |              | 55-59        |              | 65-69        | 70-74        |              |
| Belgium | Males   | 1937-1946     | 50-54         | 65-69         | 3                    |              |              |              |              | 50-54        |              | 60-64        | 65-69        |              |              |
| Belgium | Males   | 1942-1951     | 45-49         | 60-64         | 3                    |              |              |              | 45-49        |              | 55-59        | 60-64        |              |              |              |
| Belgium | Males   | 1947-1956     | 40-44         | 55-59         | 3                    |              |              | 40-44        |              | 50-54        | 55-59        |              |              |              |              |
| Belgium | Males   | 1952-1961     | 35-39         | 50-54         | 3                    |              | 35-39        |              | 45-49        | 50-54        |              |              |              |              |              |
| Belgium | Males   | 1957-1966     | 30-34         | 45-49         | 3                    | 30-34        |              | 40-44        | 45-49        |              |              |              |              |              |              |
| Belgium | Females | 1927-1936     | 60-64         | 75-79         | 3                    |              |              |              |              |              |              | 60-64        |              | 70-74        | 75-79        |
| Belgium | Females | 1932-1941     | 55-59         | 70-74         | 3                    |              |              |              |              |              | 55-59        |              | 65-69        | 70-74        |              |
| Belgium | Females | 1937-1946     | 50-54         | 65-69         | 3                    |              |              |              |              | 50-54        |              | 60-64        | 65-69        |              |              |
| Belgium | Females | 1942-1951     | 45-49         | 60-64         | 3                    |              |              |              | 45-49        |              | 55-59        | 60-64        |              |              |              |
| Belgium | Females | 1947-1956     | 40-44         | 55-59         | 3                    |              |              | 40-44        |              | 50-54        | 55-59        |              |              |              |              |
| Belgium | Females | 1952-1961     | 35-39         | 50-54         | 3                    |              | 35-39        |              | 45-49        | 50-54        |              |              |              |              |              |
| Belgium | Females | 1957-1966     | 30-34         | 45-49         | 3                    | 30-34        |              | 40-44        | 45-49        |              |              |              |              |              |              |
| Denmark | Males   | 1926-1934     | 65-69         | 75-79         | 3                    |              |              |              |              |              |              |              | 65-69        | 70-74        | 75-79        |

| Country         | Sex     | Birth- cohort | Min age group | Max age group | Number of age groups | Age category |
|-----------------|---------|---------------|---------------|---------------|----------------------|--------------|--------------|--------------|--------------|--------------|--------------|--------------|--------------|--------------|--------------|
| Denmark         | Males   | 1931-1939     | 60-64         | 75-79         | 4                    |              |              |              |              |              |              | 60-64        | 65-69        | 70-74        | 75-79        |
| Denmark         | Males   | 1936-1944     | 55-59         | 70-74         | 4                    |              |              |              |              |              | 55-59        | 60-64        | 65-69        | 70-74        |              |
| Denmark         | Males   | 1941-1949     | 50-54         | 65-69         | 4                    |              |              |              |              | 50-54        | 55-59        | 60-64        | 65-69        |              |              |
| Denmark         | Males   | 1946-1954     | 45-49         | 60-64         | 4                    |              |              | 45-49        |              | 50-54        | 55-59        | 60-64        |              |              |              |
| Denmark         | Males   | 1951-1959     | 40-44         | 55-59         | 4                    |              |              | 40-44        | 45-49        | 50-54        | 55-59        |              |              |              |              |
| Denmark         | Males   | 1956-1964     | 35-39         | 50-54         | 4                    |              | 35-39        | 40-44        | 45-49        | 50-54        |              |              |              |              |              |
| Denmark         | Males   | 1961-1969     | 30-34         | 45-49         | 4                    | 30-34        | 35-39        | 40-44        | 45-49        |              |              |              |              |              |              |
| Denmark         | Males   | 1966-1974     | 30-34         | 40-44         | 3                    | 30-34        | 35-39        | 40-44        |              |              |              |              |              |              |              |
| Denmark         | Females | 1926-1934     | 65-69         | 75-79         | 3                    |              |              |              |              |              |              |              | 65-69        | 70-74        | 75-79        |
| Denmark         | Females | 1931-1939     | 60-64         | 75-79         | 4                    |              |              |              |              |              |              | 60-64        | 65-69        | 70-74        | 75-79        |
| Denmark         | Females | 1936-1944     | 55-59         | 70-74         | 4                    |              |              |              |              | 55-59        |              | 60-64        | 65-69        | 70-74        |              |
| Denmark         | Females | 1941-1949     | 50-54         | 65-69         | 4                    |              |              |              |              | 50-54        | 55-59        | 60-64        | 65-69        |              |              |
| Denmark         | Females | 1946-1954     | 45-49         | 60-64         | 4                    |              |              | 45-49        |              | 50-54        | 55-59        | 60-64        |              |              |              |
| Denmark         | Females | 1951-1959     | 40-44         | 55-59         | 4                    |              |              | 40-44        | 45-49        | 50-54        | 55-59        |              |              |              |              |
| Denmark         | Females | 1956-1964     | 35-39         | 50-54         | 4                    |              | 35-39        | 40-44        | 45-49        | 50-54        |              |              |              |              |              |
| Denmark         | Females | 1961-1969     | 30-34         | 45-49         | 4                    | 30-34        | 35-39        | 40-44        | 45-49        |              |              |              |              |              |              |
| Denmark         | Females | 1966-1974     | 30-34         | 40-44         | 3                    | 30-34        | 35-39        | 40-44        |              |              |              |              |              |              |              |
| England & Wales | Males   | 1904-1913     | 65-69         | 75-79         | 3                    |              |              |              |              |              |              |              | 65-69        | 70-74        | 75-79        |
| England & Wales | Males   | 1909-1918     | 60-64         | 75-79         | 4                    |              |              |              |              |              |              | 60-64        | 65-69        | 70-74        | 75-79        |
| England & Wales | Males   | 1914-1923     | 55-59         | 75-79         | 5                    |              |              |              |              | 55-59        |              | 60-64        | 65-69        | 70-74        | 75-79        |
| England & Wales | Males   | 1919-1928     | 50-54         | 75-79         | 6                    |              |              |              |              | 50-54        | 55-59        | 60-64        | 65-69        | 70-74        | 75-79        |
| England & Wales | Males   | 1924-1933     | 45-49         | 75-79         | 7                    |              |              |              | 45-49        | 50-54        | 55-59        | 60-64        | 65-69        | 70-74        | 75-79        |
| England & Wales | Males   | 1929-1938     | 40-44         | 75-79         | 8                    |              |              | 40-44        | 45-49        | 50-54        | 55-59        | 60-64        | 65-69        | 70-74        | 75-79        |
| England & Wales | Males   | 1934-1943     | 35-39         | 75-79         | 9                    |              | 35-39        | 40-44        | 45-49        | 50-54        | 55-59        | 60-64        | 65-69        | 70-74        | 75-79        |
| England & Wales | Males   | 1939-1948     | 40-44         | 70-74         | 7                    |              |              | 40-44        | 45-49        | 50-54        | 55-59        | 60-64        | 65-69        | 70-74        |              |
| England & Wales | Males   | 1944-1953     | 35-39         | 65-69         | 7                    |              | 35-39        | 40-44        | 45-49        | 50-54        | 55-59        | 60-64        | 65-69        |              |              |
| England & Wales | Males   | 1949-1958     | 40-44         | 60-64         | 5                    |              |              | 40-44        | 45-49        | 50-54        | 55-59        | 60-64        |              |              |              |
| England & Wales | Males   | 1954-1963     | 35-39         | 55-59         | 5                    |              | 35-39        | 40-44        | 45-49        | 50-54        | 55-59        |              |              |              |              |
| England & Wales | Males   | 1959-1968     | 40-44         | 50-54         | 3                    |              |              | 40-44        | 45-49        | 50-54        |              |              |              |              |              |
| England & Wales | Males   | 1964-1973     | 35-39         | 45-49         | 3                    |              | 35-39        | 40-44        | 45-49        |              |              |              |              |              |              |
| England & Wales | Females | 1904-1913     | 65-69         | 75-79         | 3                    |              |              |              |              |              |              |              | 65-69        | 70-74        | 75-79        |
| England & Wales | Females | 1909-1918     | 60-64         | 75-79         | 4                    |              |              |              |              |              |              | 60-64        | 65-69        | 70-74        | 75-79        |
| England & Wales | Females | 1914-1923     | 55-59         | 75-79         | 5                    |              |              |              |              | 55-59        |              | 60-64        | 65-69        | 70-74        | 75-79        |
| England & Wales | Females | 1919-1928     | 50-54         | 75-79         | 6                    |              |              |              |              | 50-54        | 55-59        | 60-64        | 65-69        | 70-74        | 75-79        |

| Country         | Sex     | Birth- cohort | Min age group | Max age group | Number of age groups | Age category |
|-----------------|---------|---------------|---------------|---------------|----------------------|--------------|--------------|--------------|--------------|--------------|--------------|--------------|--------------|--------------|--------------|
| England & Wales | Females | 1924-1933     | 45-49         | 75-79         | 7                    |              |              |              | 45-49        | 50-54        | 55-59        | 60-64        | 65-69        | 70-74        | 75-79        |
| England & Wales | Females | 1929-1938     | 40-44         | 75-79         | 7                    |              |              | 40-44        |              | 50-54        | 55-59        | 60-64        | 65-69        | 70-74        | 75-79        |
| England & Wales | Females | 1934-1943     | 45-49         | 75-79         | 7                    |              |              |              | 45-49        | 50-54        | 55-59        | 60-64        | 65-69        | 70-74        | 75-79        |
| England & Wales | Females | 1939-1948     | 40-44         | 70-74         | 7                    |              |              | 40-44        | 45-49        | 50-54        | 55-59        | 60-64        | 65-69        | 70-74        |              |
| England & Wales | Females | 1944-1953     | 45-49         | 65-69         | 5                    |              |              |              | 45-49        | 50-54        | 55-59        | 60-64        | 65-69        |              |              |
| England & Wales | Females | 1949-1958     | 40-44         | 60-64         | 5                    |              |              | 40-44        | 45-49        | 50-54        | 55-59        | 60-64        |              |              |              |
| England & Wales | Females | 1954-1963     | 35-39         | 55-59         | 5                    |              | 35-39        | 40-44        | 45-49        | 50-54        | 55-59        |              |              |              |              |
| England & Wales | Females | 1959-1968     | 40-44         | 50-54         | 3                    |              |              | 40-44        | 45-49        | 50-54        |              |              |              |              |              |
| England & Wales | Females | 1964-1973     | 35-39         | 45-49         | 3                    |              | 35-39        | 40-44        | 45-49        |              |              |              |              |              |              |
| Estonia         | Males   | 1933-1941     | 65-69         | 75-79         | 3                    |              |              |              |              |              |              |              | 65-69        | 70-74        | 75-79        |
| Estonia         | Males   | 1938-1946     | 60-64         | 70-74         | 3                    |              |              |              |              |              |              | 60-64        | 65-69        | 70-74        |              |
| Estonia         | Males   | 1943-1951     | 55-59         | 65-69         | 3                    |              |              |              |              |              | 55-59        | 60-64        | 65-69        |              |              |
| Estonia         | Males   | 1948-1956     | 50-54         | 60-64         | 3                    |              |              |              |              | 50-54        | 55-59        | 60-64        |              |              |              |
| Estonia         | Males   | 1953-1961     | 45-49         | 55-59         | 3                    |              |              |              | 45-49        | 50-54        | 55-59        |              |              |              |              |
| Estonia         | Males   | 1958-1966     | 40-44         | 50-54         | 3                    |              |              | 40-44        | 45-49        | 50-54        |              |              |              |              |              |
| Estonia         | Males   | 1963-1971     | 35-39         | 45-49         | 3                    |              | 35-39        | 40-44        | 45-49        |              |              |              |              |              |              |
| Estonia         | Males   | 1968-1976     | 30-34         | 40-44         | 3                    | 30-34        | 35-39        | 40-44        |              |              |              |              |              |              |              |
| Estonia         | Females | 1933-1941     | 65-69         | 75-79         | 3                    |              |              |              |              |              |              |              | 65-69        | 70-74        | 75-79        |
| Estonia         | Females | 1938-1946     | 60-64         | 70-74         | 3                    |              |              |              |              |              |              | 60-64        | 65-69        | 70-74        |              |
| Estonia         | Females | 1943-1951     | 55-59         | 65-69         | 3                    |              |              |              |              |              | 55-59        | 60-64        | 65-69        |              |              |
| Estonia         | Females | 1948-1956     | 50-54         | 60-64         | 3                    |              |              |              |              | 50-54        | 55-59        | 60-64        |              |              |              |
| Estonia         | Females | 1953-1961     | 45-49         | 55-59         | 3                    |              |              |              | 45-49        | 50-54        | 55-59        |              |              |              |              |
| Estonia         | Females | 1958-1966     | 40-44         | 50-54         | 3                    |              |              | 40-44        | 45-49        | 50-54        |              |              |              |              |              |
| Estonia         | Females | 1963-1971     | 35-39         | 45-49         | 3                    |              | 35-39        | 40-44        | 45-49        |              |              |              |              |              |              |
| Estonia         | Females | 1968-1976     | 30-34         | 40-44         | 3                    | 30-34        | 35-39        | 40-44        |              |              |              |              |              |              |              |
| Finland         | Males   | 1902-1910     | 65-69         | 75-79         | 3                    |              |              |              |              |              |              |              | 65-69        | 70-74        | 75-79        |
| Finland         | Males   | 1907-1915     | 60-64         | 75-79         | 4                    |              |              |              |              |              |              | 60-64        | 65-69        | 70-74        | 75-79        |
| Finland         | Males   | 1912-1920     | 55-59         | 75-79         | 5                    |              |              |              |              |              | 55-59        | 60-64        | 65-69        | 70-74        | 75-79        |
| Finland         | Males   | 1917-1925     | 50-54         | 75-79         | 6                    |              |              |              |              | 50-54        | 55-59        | 60-64        | 65-69        | 70-74        | 75-79        |
| Finland         | Males   | 1922-1930     | 45-49         | 75-79         | 7                    |              |              |              | 45-49        | 50-54        | 55-59        | 60-64        | 65-69        | 70-74        | 75-79        |
| Finland         | Males   | 1927-1935     | 40-44         | 75-79         | 8                    |              |              | 40-44        | 45-49        | 50-54        | 55-59        | 60-64        | 65-69        | 70-74        | 75-79        |
| Finland         | Males   | 1932-1940     | 35-39         | 75-79         | 9                    |              | 35-39        | 40-44        | 45-49        | 50-54        | 55-59        | 60-64        | 65-69        | 70-74        | 75-79        |
| Finland         | Males   | 1937-1945     | 30-34         | 70-74         | 9                    | 30-34        | 35-39        | 40-44        | 45-49        | 50-54        | 55-59        | 60-64        | 65-69        | 70-74        |              |
| Finland         | Males   | 1942-1950     | 35-39         | 65-69         | 7                    |              | 35-39        | 40-44        | 45-49        | 50-54        | 55-59        | 60-64        | 65-69        |              |              |

| Country | Sex     | Birth- cohort | Min age group | Max age group | Number of age groups | Age category |
|---------|---------|---------------|---------------|---------------|----------------------|--------------|--------------|--------------|--------------|--------------|--------------|--------------|--------------|--------------|--------------|
| Finland | Males   | 1947-1955     | 30-34         | 60-64         | 7                    | 30-34        | 35-39        | 40-44        | 45-49        | 50-54        | 55-59        | 60-64        |              |              |              |
| Finland | Males   | 1952-1960     | 35-39         | 55-59         | 5                    |              | 35-39        | 40-44        | 45-49        | 50-54        | 55-59        |              |              |              |              |
| Finland | Males   | 1957-1965     | 30-34         | 50-54         | 5                    | 30-34        | 35-39        | 40-44        | 45-49        | 50-54        |              |              |              |              |              |
| Finland | Males   | 1962-1970     | 35-39         | 45-49         | 3                    |              | 35-39        | 40-44        | 45-49        |              |              |              |              |              |              |
| Finland | Males   | 1967-1975     | 30-34         | 40-44         | 3                    | 30-34        | 35-39        | 40-44        |              |              |              |              |              |              |              |
| Finland | Females | 1902-1910     | 65-69         | 75-79         | 3                    |              |              |              |              |              |              |              | 65-69        | 70-74        | 75-79        |
| Finland | Females | 1907-1915     | 60-64         | 75-79         | 4                    |              |              |              |              |              |              | 60-64        | 65-69        | 70-74        | 75-79        |
| Finland | Females | 1912-1920     | 55-59         | 75-79         | 5                    |              |              |              |              |              | 55-59        | 60-64        | 65-69        | 70-74        | 75-79        |
| Finland | Females | 1917-1925     | 50-54         | 75-79         | 6                    |              |              |              |              | 50-54        | 55-59        | 60-64        | 65-69        | 70-74        | 75-79        |
| Finland | Females | 1922-1930     | 45-49         | 75-79         | 7                    |              |              |              | 45-49        | 50-54        | 55-59        | 60-64        | 65-69        | 70-74        | 75-79        |
| Finland | Females | 1927-1935     | 40-44         | 75-79         | 8                    |              |              | 40-44        | 45-49        | 50-54        | 55-59        | 60-64        | 65-69        | 70-74        | 75-79        |
| Finland | Females | 1932-1940     | 35-39         | 75-79         | 9                    |              | 35-39        | 40-44        | 45-49        | 50-54        | 55-59        | 60-64        | 65-69        | 70-74        | 75-79        |
| Finland | Females | 1937-1945     | 30-34         | 70-74         | 9                    | 30-34        | 35-39        | 40-44        | 45-49        | 50-54        | 55-59        | 60-64        | 65-69        | 70-74        |              |
| Finland | Females | 1942-1950     | 35-39         | 65-69         | 7                    |              | 35-39        | 40-44        | 45-49        | 50-54        | 55-59        | 60-64        | 65-69        |              |              |
| Finland | Females | 1947-1955     | 30-34         | 60-64         | 7                    | 30-34        | 35-39        | 40-44        | 45-49        | 50-54        | 55-59        | 60-64        |              |              |              |
| Finland | Females | 1952-1960     | 35-39         | 55-59         | 5                    |              | 35-39        | 40-44        | 45-49        | 50-54        | 55-59        |              |              |              |              |
| Finland | Females | 1957-1965     | 30-34         | 50-54         | 5                    | 30-34        | 35-39        | 40-44        | 45-49        | 50-54        |              |              |              |              |              |
| Finland | Females | 1962-1970     | 35-39         | 45-49         | 3                    |              | 35-39        | 40-44        | 45-49        |              |              |              |              |              |              |
| Finland | Females | 1967-1975     | 30-34         | 40-44         | 3                    | 30-34        | 35-39        | 40-44        |              |              |              |              |              |              |              |
| France  | Males   | 1906-1914     | 65-69         | 75-79         | 3                    |              |              |              |              |              |              |              | 65-69        | 70-74        | 75-79        |
| France  | Males   | 1911-1919     | 60-64         | 75-79         | 4                    |              |              |              |              |              |              | 60-64        | 65-69        | 70-74        | 75-79        |
| France  | Males   | 1916-1924     | 55-59         | 75-79         | 5                    |              |              |              |              |              | 55-59        | 60-64        | 65-69        | 70-74        | 75-79        |
| France  | Males   | 1921-1929     | 50-54         | 75-79         | 6                    |              |              |              |              | 50-54        | 55-59        | 60-64        | 65-69        | 70-74        | 75-79        |
| France  | Males   | 1926-1934     | 50-54         | 75-79         | 6                    |              |              |              |              | 50-54        | 55-59        | 60-64        | 65-69        | 70-74        | 75-79        |
| France  | Males   | 1931-1939     | 45-49         | 70-74         | 6                    |              |              |              | 45-49        | 50-54        | 55-59        | 60-64        | 65-69        | 70-74        |              |
| France  | Males   | 1936-1944     | 40-44         | 65-69         | 6                    |              |              | 40-44        | 45-49        | 50-54        | 55-59        | 60-64        | 65-69        |              |              |
| France  | Males   | 1941-1949     | 35-39         | 60-64         | 6                    |              | 35-39        | 40-44        | 45-49        | 50-54        | 55-59        | 60-64        |              |              |              |
| France  | Males   | 1946-1954     | 40-44         | 55-59         | 4                    |              |              | 40-44        | 45-49        | 50-54        | 55-59        |              |              |              |              |
| France  | Males   | 1951-1959     | 35-39         | 50-54         | 4                    |              | 35-39        | 40-44        | 45-49        | 50-54        |              |              |              |              |              |
| France  | Males   | 1956-1964     | 35-39         | 45-49         | 3                    |              | 35-39        | 40-44        | 45-49        |              |              |              |              |              |              |
| France  | Females | 1906-1914     | 65-69         | 75-79         | 3                    |              |              |              |              |              |              |              | 65-69        | 70-74        | 75-79        |
| France  | Females | 1916-1924     | 60-64         | 75-79         | 4                    |              |              |              |              |              |              | 60-64        | 65-69        | 70-74        | 75-79        |
| France  | Females | 1921-1929     | 55-59         | 75-79         | 4                    |              |              |              |              |              | 55-59        |              | 65-69        | 70-74        | 75-79        |
| France  | Females | 1926-1934     | 60-64         | 75-79         | 4                    |              |              |              |              |              |              | 60-64        | 65-69        | 70-74        | 75-79        |

| Country       | Sex     | Birth- cohort | Min age group | Max age group | Number of age groups | Age category |
|---------------|---------|---------------|---------------|---------------|----------------------|--------------|--------------|--------------|--------------|--------------|--------------|--------------|--------------|--------------|--------------|
| France        | Females | 1931-1939     | 60-64         | 70-74         | 3                    |              |              |              |              |              |              | 60-64        | 65-69        | 70-74        |              |
| France        | Females | 1936-1944     | 50-54         | 65-69         | 4                    |              |              |              |              | 50-54        | 55-59        | 60-64        | 65-69        |              |              |
| France        | Females | 1941-1949     | 45-49         | 60-64         | 4                    |              |              |              | 45-49        | 50-54        | 55-59        | 60-64        |              |              |              |
| France        | Females | 1946-1954     | 40-44         | 55-59         | 4                    |              |              | 40-44        | 45-49        | 50-54        | 55-59        |              |              |              |              |
| France        | Females | 1951-1959     | 40-44         | 50-54         | 3                    |              |              | 40-44        | 45-49        | 50-54        |              |              |              |              |              |
| Hungary       | Males   | 1909-1916     | 60-64         | 75-79         | 3                    |              |              |              |              |              |              | 60-64        | 65-69        |              | 75-79        |
| Hungary       | Males   | 1914-1921     | 55-59         | 70-74         | 3                    |              |              |              |              |              | 55-59        | 60-64        |              | 70-74        |              |
| Hungary       | Males   | 1919-1926     | 50-54         | 75-79         | 4                    |              |              |              |              | 50-54        | 55-59        |              | 65-69        |              | 75-79        |
| Hungary       | Males   | 1924-1931     | 45-49         | 70-74         | 4                    |              |              |              | 45-49        | 50-54        |              | 60-64        |              | 70-74        |              |
| Hungary       | Males   | 1929-1936     | 40-44         | 75-79         | 5                    |              |              | 40-44        | 45-49        |              | 55-59        |              | 65-69        |              | 75-79        |
| Hungary       | Males   | 1934-1941     | 35-39         | 70-74         | 5                    |              | 35-39        | 40-44        |              | 50-54        |              | 60-64        |              | 70-74        |              |
| Hungary       | Males   | 1939-1946     | 30-34         | 65-69         | 5                    | 30-34        | 35-39        |              | 45-49        |              | 55-59        |              | 65-69        |              |              |
| Hungary       | Males   | 1944-1951     | 30-34         | 60-64         | 4                    | 30-34        |              | 40-44        |              | 50-54        |              | 60-64        |              |              |              |
| Hungary       | Males   | 1949-1956     | 35-39         | 55-59         | 3                    |              | 35-39        |              | 45-49        |              | 55-59        |              |              |              |              |
| Hungary       | Males   | 1954-1961     | 30-34         | 50-54         | 3                    | 30-34        |              | 40-44        |              | 50-54        |              |              |              |              |              |
| Hungary       | Females | 1909-1916     | 60-64         | 75-79         | 3                    |              |              |              |              |              |              | 60-64        | 65-69        |              | 75-79        |
| Hungary       | Females | 1914-1921     | 55-59         | 70-74         | 3                    |              |              |              |              |              | 55-59        | 60-64        |              | 70-74        |              |
| Hungary       | Females | 1919-1926     | 50-54         | 75-79         | 4                    |              |              |              |              | 50-54        | 55-59        |              | 65-69        |              | 75-79        |
| Hungary       | Females | 1924-1931     | 45-49         | 70-74         | 4                    |              |              |              | 45-49        | 50-54        |              | 60-64        |              | 70-74        |              |
| Hungary       | Females | 1929-1936     | 40-44         | 75-79         | 5                    |              |              | 40-44        | 45-49        |              | 55-59        |              | 65-69        |              | 75-79        |
| Hungary       | Females | 1934-1941     | 35-39         | 70-74         | 5                    |              | 35-39        | 40-44        |              | 50-54        |              | 60-64        |              | 70-74        |              |
| Hungary       | Females | 1939-1946     | 30-34         | 65-69         | 5                    | 30-34        | 35-39        |              | 45-49        |              | 55-59        |              | 65-69        |              |              |
| Hungary       | Females | 1944-1951     | 30-34         | 60-64         | 4                    | 30-34        |              | 40-44        |              | 50-54        |              | 60-64        |              |              |              |
| Hungary       | Females | 1949-1956     | 35-39         | 55-59         | 3                    |              | 35-39        |              | 45-49        |              | 55-59        |              |              |              |              |
| Hungary       | Females | 1954-1961     | 30-34         | 50-54         | 3                    | 30-34        |              | 40-44        |              | 50-54        |              |              |              |              |              |
| Italy (Turin) | Males   | 1902-1911     | 65-69         | 75-79         | 3                    |              |              |              |              |              |              |              | 65-69        | 70-74        | 75-79        |
| Italy (Turin) | Males   | 1907-1916     | 60-64         | 75-79         | 4                    |              |              |              |              |              |              | 60-64        | 65-69        | 70-74        | 75-79        |
| Italy (Turin) | Males   | 1912-1921     | 55-59         | 75-79         | 5                    |              |              |              |              |              | 55-59        | 60-64        | 65-69        | 70-74        | 75-79        |
| Italy (Turin) | Males   | 1917-1926     | 50-54         | 75-79         | 6                    |              |              |              |              | 50-54        | 55-59        | 60-64        | 65-69        | 70-74        | 75-79        |
| Italy (Turin) | Males   | 1922-1931     | 45-49         | 75-79         | 7                    |              |              |              | 45-49        | 50-54        | 55-59        | 60-64        | 65-69        | 70-74        | 75-79        |
| Italy (Turin) | Males   | 1927-1936     | 45-49         | 75-79         | 7                    |              |              |              | 45-49        | 50-54        | 55-59        | 60-64        | 65-69        | 70-74        | 75-79        |
| Italy (Turin) | Males   | 1932-1941     | 35-39         | 75-79         | 9                    |              | 35-39        | 40-44        | 45-49        | 50-54        | 55-59        | 60-64        | 65-69        | 70-74        | 75-79        |
| Italy (Turin) | Males   | 1937-1946     | 40-44         | 70-74         | 7                    |              |              | 40-44        | 45-49        | 50-54        | 55-59        | 60-64        | 65-69        | 70-74        |              |
| Italy (Turin) | Males   | 1942-1951     | 35-39         | 65-69         | 7                    |              | 35-39        | 40-44        | 45-49        | 50-54        | 55-59        | 60-64        | 65-69        |              |              |



| Country       | Sex     | Birth- cohort | Min age group | Max age group | Number of age groups | Age category |
|---------------|---------|---------------|---------------|---------------|----------------------|--------------|--------------|--------------|--------------|--------------|--------------|--------------|--------------|--------------|--------------|
| Italy (Turin) | Males   | 1947-1956     | 40-44         | 60-64         | 5                    |              |              | 40-44        | 45-49        | 50-54        | 55-59        | 60-64        |              |              |              |
| Italy (Turin) | Males   | 1952-1961     | 35-39         | 55-59         | 5                    |              | 35-39        | 40-44        | 45-49        | 50-54        | 55-59        |              |              |              |              |
| Italy (Turin) | Males   | 1957-1966     | 40-44         | 50-54         | 3                    |              |              | 40-44        | 45-49        | 50-54        |              |              |              |              |              |
| Italy (Turin) | Males   | 1962-1971     | 35-39         | 45-49         | 3                    |              | 35-39        | 40-44        | 45-49        |              |              |              |              |              |              |
| Italy (Turin) | Females | 1902-1911     | 65-69         | 75-79         | 3                    |              |              |              |              |              |              |              | 65-69        | 70-74        | 75-79        |
| Italy (Turin) | Females | 1907-1916     | 60-64         | 75-79         | 4                    |              |              |              |              |              |              | 60-64        | 65-69        | 70-74        | 75-79        |
| Italy (Turin) | Females | 1912-1921     | 60-64         | 75-79         | 4                    |              |              |              |              |              |              | 60-64        | 65-69        | 70-74        | 75-79        |
| Italy (Turin) | Females | 1917-1926     | 50-54         | 75-79         | 6                    |              |              |              |              | 50-54        | 55-59        | 60-64        | 65-69        | 70-74        | 75-79        |
| Italy (Turin) | Females | 1922-1931     | 45-49         | 75-79         | 7                    |              |              | 45-49        | 50-54        | 55-59        | 60-64        | 65-69        | 70-74        | 75-79        |              |
| Italy (Turin) | Females | 1927-1936     | 45-49         | 75-79         | 7                    |              |              | 45-49        | 50-54        | 55-59        | 60-64        | 65-69        | 70-74        | 75-79        |              |
| Italy (Turin) | Females | 1932-1941     | 50-54         | 75-79         | 6                    |              |              |              | 50-54        | 55-59        | 60-64        | 65-69        | 70-74        | 75-79        |              |
| Italy (Turin) | Females | 1937-1946     | 40-44         | 70-74         | 7                    |              |              | 40-44        | 45-49        | 50-54        | 55-59        | 60-64        | 65-69        | 70-74        |              |
| Italy (Turin) | Females | 1942-1951     | 35-39         | 65-69         | 7                    |              | 35-39        | 40-44        | 45-49        | 50-54        | 55-59        | 60-64        | 65-69        |              |              |
| Italy (Turin) | Females | 1947-1956     | 40-44         | 60-64         | 5                    |              |              | 40-44        | 45-49        | 50-54        | 55-59        | 60-64        |              |              |              |
| Italy (Turin) | Females | 1952-1961     | 35-39         | 55-59         | 5                    |              | 35-39        | 40-44        | 45-49        | 50-54        | 55-59        |              |              |              |              |
| Italy (Turin) | Females | 1957-1966     | 40-44         | 50-54         | 3                    |              |              | 40-44        | 45-49        | 50-54        |              |              |              |              |              |
| Lithuania     | Males   | 1932-1940     | 65-69         | 75-79         | 3                    |              |              |              |              |              |              |              | 65-69        | 70-74        | 75-79        |
| Lithuania     | Males   | 1937-1945     | 60-64         | 70-74         | 3                    |              |              |              |              |              |              | 60-64        | 65-69        | 70-74        |              |
| Lithuania     | Males   | 1942-1950     | 55-59         | 65-69         | 3                    |              |              |              |              |              | 55-59        | 60-64        | 65-69        |              |              |
| Lithuania     | Males   | 1947-1955     | 50-54         | 60-64         | 3                    |              |              |              |              | 50-54        | 55-59        | 60-64        |              |              |              |
| Lithuania     | Males   | 1952-1960     | 45-49         | 55-59         | 3                    |              |              | 45-49        | 50-54        | 55-59        |              |              |              |              |              |
| Lithuania     | Males   | 1957-1965     | 40-44         | 50-54         | 3                    |              |              | 40-44        | 45-49        | 50-54        |              |              |              |              |              |
| Lithuania     | Males   | 1962-1970     | 35-39         | 45-49         | 3                    |              | 35-39        | 40-44        | 45-49        |              |              |              |              |              |              |
| Lithuania     | Males   | 1967-1975     | 30-34         | 40-44         | 3                    | 30-34        | 35-39        | 40-44        |              |              |              |              |              |              |              |
| Lithuania     | Females | 1932-1940     | 65-69         | 75-79         | 3                    |              |              |              |              |              |              |              | 65-69        | 70-74        | 75-79        |
| Lithuania     | Females | 1937-1945     | 60-64         | 70-74         | 3                    |              |              |              |              |              |              | 60-64        | 65-69        | 70-74        |              |
| Lithuania     | Females | 1942-1950     | 55-59         | 65-69         | 3                    |              |              |              |              |              | 55-59        | 60-64        | 65-69        |              |              |
| Lithuania     | Females | 1947-1955     | 50-54         | 60-64         | 3                    |              |              |              |              | 50-54        | 55-59        | 60-64        |              |              |              |
| Lithuania     | Females | 1952-1960     | 45-49         | 55-59         | 3                    |              |              | 45-49        | 50-54        | 55-59        |              |              |              |              |              |
| Lithuania     | Females | 1957-1965     | 40-44         | 50-54         | 3                    |              |              | 40-44        | 45-49        | 50-54        |              |              |              |              |              |
| Lithuania     | Females | 1962-1970     | 35-39         | 45-49         | 3                    |              | 35-39        | 40-44        | 45-49        |              |              |              |              |              |              |
| Lithuania     | Females | 1967-1975     | 30-34         | 40-44         | 3                    | 30-34        | 35-39        | 40-44        |              |              |              |              |              |              |              |
| Norway        | Males   | 1902-1910     | 65-69         | 75-79         | 3                    |              |              |              |              |              |              |              | 65-69        | 70-74        | 75-79        |
| Norway        | Males   | 1907-1915     | 60-64         | 75-79         | 4                    |              |              |              |              |              |              | 60-64        | 65-69        | 70-74        | 75-79        |

| Country           | Sex     | Birth- cohort | Min age group | Max age group | Number of age groups | Age category |
|-------------------|---------|---------------|---------------|---------------|----------------------|--------------|--------------|--------------|--------------|--------------|--------------|--------------|--------------|--------------|--------------|
| Norway            | Males   | 1912-1920     | 55-59         | 75-79         | 5                    |              |              |              |              |              | 55-59        | 60-64        | 65-69        | 70-74        | 75-79        |
| Norway            | Males   | 1917-1925     | 50-54         | 75-79         | 6                    |              |              |              |              | 50-54        | 55-59        | 60-64        | 65-69        | 70-74        | 75-79        |
| Norway            | Males   | 1922-1930     | 45-49         | 75-79         | 7                    |              |              |              | 45-49        | 50-54        | 55-59        | 60-64        | 65-69        | 70-74        | 75-79        |
| Norway            | Males   | 1927-1935     | 40-44         | 75-79         | 8                    |              |              | 40-44        | 45-49        | 50-54        | 55-59        | 60-64        | 65-69        | 70-74        | 75-79        |
| Norway            | Males   | 1932-1940     | 40-44         | 70-74         | 7                    |              |              | 40-44        | 45-49        | 50-54        | 55-59        | 60-64        | 65-69        | 70-74        |              |
| Norway            | Males   | 1937-1945     | 40-44         | 65-69         | 6                    |              |              | 40-44        | 45-49        | 50-54        | 55-59        | 60-64        | 65-69        |              |              |
| Norway            | Males   | 1942-1950     | 40-44         | 60-64         | 5                    |              |              | 40-44        | 45-49        | 50-54        | 55-59        | 60-64        |              |              |              |
| Norway            | Males   | 1947-1955     | 40-44         | 55-59         | 4                    |              |              | 40-44        | 45-49        | 50-54        | 55-59        |              |              |              |              |
| Norway            | Males   | 1952-1960     | 40-44         | 50-54         | 3                    |              |              | 40-44        | 45-49        | 50-54        |              |              |              |              |              |
| Norway            | Females | 1902-1910     | 65-69         | 75-79         | 3                    |              |              |              |              |              |              |              | 65-69        | 70-74        | 75-79        |
| Norway            | Females | 1907-1915     | 60-64         | 75-79         | 4                    |              |              |              |              |              |              | 60-64        | 65-69        | 70-74        | 75-79        |
| Norway            | Females | 1912-1920     | 55-59         | 75-79         | 5                    |              |              |              |              |              | 55-59        | 60-64        | 65-69        | 70-74        | 75-79        |
| Norway            | Females | 1917-1925     | 50-54         | 75-79         | 6                    |              |              |              |              | 50-54        | 55-59        | 60-64        | 65-69        | 70-74        | 75-79        |
| Norway            | Females | 1922-1930     | 45-49         | 75-79         | 7                    |              |              |              | 45-49        | 50-54        | 55-59        | 60-64        | 65-69        | 70-74        | 75-79        |
| Norway            | Females | 1927-1935     | 40-44         | 75-79         | 8                    |              |              | 40-44        | 45-49        | 50-54        | 55-59        | 60-64        | 65-69        | 70-74        | 75-79        |
| Norway            | Females | 1932-1940     | 40-44         | 70-74         | 7                    |              |              | 40-44        | 45-49        | 50-54        | 55-59        | 60-64        | 65-69        | 70-74        |              |
| Norway            | Females | 1937-1945     | 40-44         | 65-69         | 6                    |              |              | 40-44        | 45-49        | 50-54        | 55-59        | 60-64        | 65-69        |              |              |
| Norway            | Females | 1942-1950     | 40-44         | 60-64         | 5                    |              |              | 40-44        | 45-49        | 50-54        | 55-59        | 60-64        |              |              |              |
| Norway            | Females | 1947-1955     | 40-44         | 55-59         | 4                    |              |              | 40-44        | 45-49        | 50-54        | 55-59        |              |              |              |              |
| Norway            | Females | 1952-1960     | 40-44         | 50-54         | 3                    |              |              | 40-44        | 45-49        | 50-54        |              |              |              |              |              |
| Spain (Barcelona) | Males   | 1923-1931     | 65-69         | 75-79         | 3                    |              |              |              |              |              |              |              | 65-69        | 70-74        | 75-79        |
| Spain (Barcelona) | Males   | 1928-1936     | 60-64         | 75-79         | 4                    |              |              |              |              |              |              | 60-64        | 65-69        | 70-74        | 75-79        |
| Spain (Barcelona) | Males   | 1933-1941     | 55-59         | 75-79         | 5                    |              |              |              |              |              | 55-59        | 60-64        | 65-69        | 70-74        | 75-79        |
| Spain (Barcelona) | Males   | 1938-1946     | 50-54         | 70-74         | 5                    |              |              |              |              | 50-54        | 55-59        | 60-64        | 65-69        | 70-74        |              |
| Spain (Barcelona) | Males   | 1943-1951     | 45-49         | 65-69         | 5                    |              |              |              | 45-49        | 50-54        | 55-59        | 60-64        | 65-69        |              |              |
| Spain (Barcelona) | Males   | 1948-1956     | 40-44         | 60-64         | 5                    |              |              | 40-44        | 45-49        | 50-54        | 55-59        | 60-64        |              |              |              |
| Spain (Barcelona) | Males   | 1953-1961     | 35-39         | 55-59         | 5                    |              | 35-39        | 40-44        | 45-49        | 50-54        | 55-59        |              |              |              |              |
| Spain (Barcelona) | Males   | 1958-1966     | 30-34         | 50-54         | 5                    | 30-34        | 35-39        | 40-44        | 45-49        | 50-54        |              |              |              |              |              |
| Spain (Barcelona) | Males   | 1963-1971     | 30-34         | 45-49         | 4                    | 30-34        | 35-39        | 40-44        | 45-49        |              |              |              |              |              |              |
| Spain (Barcelona) | Males   | 1968-1976     | 30-34         | 40-44         | 3                    | 30-34        | 35-39        | 40-44        |              |              |              |              |              |              |              |
| Spain (Barcelona) | Females | 1923-1931     | 65-69         | 75-79         | 3                    |              |              |              |              |              |              |              | 65-69        | 70-74        | 75-79        |
| Spain (Barcelona) | Females | 1928-1936     | 60-64         | 75-79         | 4                    |              |              |              |              |              |              | 60-64        | 65-69        | 70-74        | 75-79        |
| Spain (Barcelona) | Females | 1933-1941     | 55-59         | 75-79         | 5                    |              |              |              |              |              | 55-59        | 60-64        | 65-69        | 70-74        | 75-79        |
| Spain (Barcelona) | Females | 1938-1946     | 50-54         | 70-74         | 5                    |              |              |              |              | 50-54        | 55-59        | 60-64        | 65-69        | 70-74        |              |

| Country           | Sex     | Birth- cohort | Min age group | Max age group | Number of age groups | Age category |
|-------------------|---------|---------------|---------------|---------------|----------------------|--------------|--------------|--------------|--------------|--------------|--------------|--------------|--------------|--------------|--------------|
| Spain (Barcelona) | Females | 1943-1951     | 45-49         | 65-69         | 5                    |              |              |              | 45-49        | 50-54        | 55-59        | 60-64        | 65-69        |              |              |
| Spain (Barcelona) | Females | 1948-1956     | 40-44         | 60-64         | 5                    |              |              | 40-44        | 45-49        | 50-54        | 55-59        | 60-64        |              |              |              |
| Spain (Barcelona) | Females | 1953-1961     | 35-39         | 55-59         | 5                    |              | 35-39        | 40-44        | 45-49        | 50-54        | 55-59        |              |              |              |              |
| Spain (Barcelona) | Females | 1958-1966     | 30-34         | 50-54         | 5                    | 30-34        | 35-39        | 40-44        | 45-49        | 50-54        |              |              |              |              |              |
| Spain (Barcelona) | Females | 1963-1971     | 30-34         | 45-49         | 4                    | 30-34        | 35-39        | 40-44        | 45-49        |              |              |              |              |              |              |
| Spain (Barcelona) | Females | 1968-1976     | 30-34         | 40-44         | 3                    | 30-34        | 35-39        | 40-44        |              |              |              |              |              |              |              |
| Sweden            | Males   | 1921-1929     | 65-69         | 75-79         | 3                    |              |              |              |              |              |              |              | 65-69        | 70-74        | 75-79        |
| Sweden            | Males   | 1926-1934     | 60-64         | 75-79         | 4                    |              |              |              |              |              |              | 60-64        | 65-69        | 70-74        | 75-79        |
| Sweden            | Males   | 1931-1939     | 55-59         | 70-74         | 4                    |              |              |              |              |              | 55-59        | 60-64        | 65-69        | 70-74        |              |
| Sweden            | Males   | 1936-1944     | 50-54         | 65-69         | 4                    |              |              |              |              | 50-54        | 55-59        | 60-64        | 65-69        |              |              |
| Sweden            | Males   | 1941-1949     | 45-49         | 60-64         | 4                    |              |              |              | 45-49        | 50-54        | 55-59        | 60-64        |              |              |              |
| Sweden            | Males   | 1946-1954     | 40-44         | 55-59         | 4                    |              |              | 40-44        | 45-49        | 50-54        | 55-59        |              |              |              |              |
| Sweden            | Males   | 1951-1959     | 35-39         | 50-54         | 4                    |              | 35-39        | 40-44        | 45-49        | 50-54        |              |              |              |              |              |
| Sweden            | Males   | 1956-1964     | 30-34         | 45-49         | 4                    | 30-34        | 35-39        | 40-44        | 45-49        |              |              |              |              |              |              |
| Sweden            | Females | 1921-1929     | 65-69         | 75-79         | 3                    |              |              |              |              |              |              |              | 65-69        | 70-74        | 75-79        |
| Sweden            | Females | 1926-1934     | 60-64         | 75-79         | 4                    |              |              |              |              |              |              | 60-64        | 65-69        | 70-74        | 75-79        |
| Sweden            | Females | 1931-1939     | 55-59         | 70-74         | 4                    |              |              |              |              |              | 55-59        | 60-64        | 65-69        | 70-74        |              |
| Sweden            | Females | 1936-1944     | 50-54         | 65-69         | 4                    |              |              |              |              | 50-54        | 55-59        | 60-64        | 65-69        |              |              |
| Sweden            | Females | 1941-1949     | 45-49         | 60-64         | 4                    |              |              |              | 45-49        | 50-54        | 55-59        | 60-64        |              |              |              |
| Sweden            | Females | 1946-1954     | 40-44         | 55-59         | 4                    |              |              | 40-44        | 45-49        | 50-54        | 55-59        |              |              |              |              |
| Sweden            | Females | 1951-1959     | 35-39         | 50-54         | 4                    |              | 35-39        | 40-44        | 45-49        | 50-54        |              |              |              |              |              |
| Sweden            | Females | 1956-1964     | 30-34         | 45-49         | 4                    | 30-34        | 35-39        | 40-44        | 45-49        |              |              |              |              |              |              |
| Switzerland       | Males   | 1922-1930     | 65-69         | 75-79         | 3                    |              |              |              |              |              |              |              | 65-69        | 70-74        | 75-79        |
| Switzerland       | Males   | 1927-1935     | 60-64         | 75-79         | 4                    |              |              |              |              |              |              | 60-64        | 65-69        | 70-74        | 75-79        |
| Switzerland       | Males   | 1932-1940     | 55-59         | 75-79         | 5                    |              |              |              |              |              | 55-59        | 60-64        | 65-69        | 70-74        | 75-79        |
| Switzerland       | Males   | 1937-1945     | 50-54         | 70-74         | 5                    |              |              |              |              | 50-54        | 55-59        | 60-64        | 65-69        | 70-74        |              |
| Switzerland       | Males   | 1942-1950     | 45-49         | 65-69         | 5                    |              |              |              | 45-49        | 50-54        | 55-59        | 60-64        | 65-69        |              |              |
| Switzerland       | Males   | 1947-1955     | 40-44         | 60-64         | 5                    |              |              | 40-44        | 45-49        | 50-54        | 55-59        | 60-64        |              |              |              |
| Switzerland       | Males   | 1952-1960     | 35-39         | 55-59         | 5                    |              | 35-39        | 40-44        | 45-49        | 50-54        | 55-59        |              |              |              |              |
| Switzerland       | Males   | 1957-1965     | 30-34         | 50-54         | 5                    | 30-34        | 35-39        | 40-44        | 45-49        | 50-54        |              |              |              |              |              |
| Switzerland       | Males   | 1962-1970     | 35-39         | 45-49         | 3                    |              | 35-39        | 40-44        | 45-49        |              |              |              |              |              |              |
| Switzerland       | Males   | 1967-1975     | 30-34         | 40-44         | 3                    | 30-34        | 35-39        | 40-44        |              |              |              |              |              |              |              |
| Switzerland       | Females | 1922-1930     | 65-69         | 75-79         | 3                    |              |              |              |              |              |              |              | 65-69        | 70-74        | 75-79        |
| Switzerland       | Females | 1927-1935     | 60-64         | 75-79         | 4                    |              |              |              |              |              |              | 60-64        | 65-69        | 70-74        | 75-79        |

| Country     | Sex     | Birth- cohort | Min age group | Max age group | Number of age groups | Age category |
|-------------|---------|---------------|---------------|---------------|----------------------|--------------|--------------|--------------|--------------|--------------|--------------|--------------|--------------|--------------|--------------|
| Switzerland | Females | 1932-1940     | 55-59         | 75-79         | 5                    |              |              |              |              |              | 55-59        | 60-64        | 65-69        | 70-74        | 75-79        |
| Switzerland | Females | 1937-1945     | 50-54         | 70-74         | 5                    |              |              |              |              | 50-54        | 55-59        | 60-64        | 65-69        | 70-74        |              |
| Switzerland | Females | 1942-1950     | 45-49         | 65-69         | 5                    |              |              | 45-49        | 50-54        | 55-59        | 60-64        | 65-69        |              |              |              |
| Switzerland | Females | 1947-1955     | 40-44         | 60-64         | 5                    |              | 40-44        | 45-49        | 50-54        | 55-59        | 60-64        |              |              |              |              |
| Switzerland | Females | 1952-1960     | 35-39         | 55-59         | 5                    |              | 35-39        | 40-44        | 45-49        | 50-54        | 55-59        |              |              |              |              |
| Switzerland | Females | 1957-1965     | 30-34         | 50-54         | 5                    | 30-34        | 35-39        | 40-44        | 45-49        | 50-54        |              |              |              |              |              |
| Switzerland | Females | 1962-1970     | 35-39         | 45-49         | 3                    |              | 35-39        | 40-44        | 45-49        |              |              |              |              |              |              |
| Switzerland | Females | 1967-1975     | 30-34         | 40-44         | 3                    | 30-34        | 35-39        | 40-44        |              |              |              |              |              |              |              |

Appendix 3

Mortality trends among low and high educated and birth-cohorts: eight specific causes of death

We studied mortality from two specific cause of death from each group of causes, namely ischaemic heart disease and cerebrovascular diseases (cardiovascular diseases), lung cancer and breast cancer (neoplasm), road-traffic injuries and suicide (external causes), and Chronic Obstructive Pulmonary Disease (COPD) and alcohol-related conditions (other causes) (Appendix 3 Table 6 and Appendix 6 Figure 1-2).

Table 6. ICD code numbers for the causes of death included in the analysis and possible social determinants

|                         | ICD-8                    | ICD-9                             | ICD-10                    |
|-------------------------|--------------------------|-----------------------------------|---------------------------|
| Four large groups       |                          |                                   |                           |
| Cardiovascular diseases | 390-458                  | 390-459                           | I00-I99                   |
| Neoplasms               | 140-239                  | 140-239                           | C00-C97, D00-D48          |
| External causes         | E800-E999                | E800-E999                         | V01-Y98                   |
| All other diseases      | All other                | All other                         | All other                 |
| Eight specific causes   |                          |                                   |                           |
| Ischaemic heart disease | 410-414                  | 410-414                           | I20-I25                   |
| Cerebrovascular disease | 430-438                  | 430-438                           | I60-I69                   |
| Cancer of the lung      | 162                      | 162                               | C33-C34                   |
| Cancer of the breast    | 174                      | 170-175                           | C50                       |
| COPD                    | 490-492,518              | 490-492, 494,496                  | J40-J47                   |
| Alcohol-related causes  | 291, 303, 425, 571, E860 | 291, 303, 305.0, 425.5, 571, E860 | F10, I42.6, K70, X45, K74 |
| Road traffic injuries   | E800-E827                | E800-E829                         | V01-V89, Y85              |
| Suicide                 | E950-E959                | E950-E959                         | X60-X84, Y87.0            |

Note to table ICD stands for International Classification of Diseases. Alcohol-related conditions refer to alcoholic psychosis, dependence, and abuse; alcoholic cardiomyopathy; alcoholic liver cirrhosis; and accidental poisoning by alcohol

## Appendix 4

Calculations of cohort comparative mortality figures (CCMFs)

We followed *Gardner et al*<sup>1</sup>. with the following steps of calculations for each sex and cause-of-death:

Firstly, we summed the person-years in all countries by sex and age as the standard population in each sex-age group. We summed the observed number of deaths in all countries by sex and age as the standard number of deaths in each sex-age group ( $\sum D$ ). Secondly, we calculated the expected number of deaths for each birth-cohort with the standard population and observed deaths rates in each country-sex-education level group ( $\sum F$ ). Finally, we calculate the ratio of expected number deaths  $\sum F$  in each country-sex-education level group, to the standard number of deaths  $\sum D$ , as the CCMF for every birth-cohort in each country-sex-education level group ( $CCMF = \sum F / \sum D$ ).

Each step is as follows:

**First use the following notations:**

$i$  = number of age groups;

$j$  = number of calendar-periods of time;

$e$  = level of education;

$c$  = number of countries;

$k$  = number of cohorts;

$d_{ijec}$  = number of deaths in age group  $i$  during period  $j$ , level of education  $e$ , and country  $c$ ;

$y_{ijec}$  = person-years in age group  $i$  during period  $j$ , level of education  $e$ , and country  $c$ ;

$r_{ijec} = \frac{d_{ijec}}{y_{ijec}}$  = death rate in age group  $i$  during period  $j$ , level of education  $e$ , and country  $c$ .

**Secondly, we define:**

Population structure in standard population ( $Y_i$ ): person-years summed across in all 14 countries by age;

Age-specific death rates in standard population ( $R_i$ ): number of deaths summed in all 14 countries by age ( $D_i$ ) divided by age-specific standard population ( $R_i = D_i/Y_i$ ).

---

<sup>1</sup> Gardner, M. J., and C. Osmond. "Interpretation of time trends in disease rates in the presence of generation effects." *Statistics in medicine* 3.2 (1984): 113-130.

**Then, we define:**

$$f_{ijec} = Y_i r_{ijec}$$

to be the expected number of deaths if persons in age-group  $i$  of the standard population would have been exposed to the observed death rate in age group  $i$  during cohort  $k$ , level of education  $e$ , and country  $c$ ;

$$F_{kec} = \sum_i f_{ikec}$$

To be the expected number of deaths for a specific birth-cohort  $k$  in level of education  $e$ , and country  $c$ ;

and

$$D_k = \sum_i D_i$$

to be the expected number of deaths for a specific birth-cohort  $k$  if they had standard population structure and death rates in the same age group.

Finally, the CCMF for each birth-cohort is given by:

$$= \frac{\text{Expected deaths in standard population at death rates of cohort } k, \text{ education level } e, \text{ and country } c}{\text{Expected deaths in standard at standard rates}}$$

so that

$$CCMF = \frac{F_{kec}}{D_k} = \sum_i \frac{D_i}{D_k} \frac{r_{ijec}}{R_i}$$

as CCMF is the weighted arithmetic means of age-specific rate ratios.

Calculations of (period) comparative mortality figures (CMFs)

We further followed *Gardner et al.* with the following steps of calculations for each sex and cause-of-death using the same dataset as the cohort perspective:

Firstly, we summed the person-years in all countries by sex and age as the standard population in each sex-age group. We summed the observed number of deaths in all countries by sex and age as the standard number of deaths in each sex-age group ( $\sum D$ ). Secondly, we calculated the expected number of deaths for each calendar-period with the standard population and observed deaths rates in each country-sex-education level group ( $\sum F$ ). Finally, we calculate the ratio of expected number deaths  $\sum F$  in each country-sex-education level group, to the standard number of deaths  $\sum D$ , as the CMF for every calendar-period in each country-sex-education level group ( $CMF = \sum F / \sum D$ ).

Each step is as follows:

**First use the following notations:**

$i$  = number of age groups;

$j$  = number of calendar periods of time;

$e$  = level of education;

$c$  = number of countries;

$d_{ijec}$  = number of deaths in age group  $i$  during period  $j$ , level of education  $e$ , and country  $c$ ;

$y_{ijec}$  = person-years in age group  $i$  during period  $j$ , level of education  $e$ , and country  $c$ ;

$r_{ijec} = \frac{d_{ijec}}{y_{ijec}}$  = death rate in age group  $i$  during period  $j$ , level of education  $e$ , and country  $c$ .

**Secondly, we define:**

Population structure in standard population ( $Y_i$ ): person-years summed across in all 14 countries by age;

Age-specific death rates in standard population ( $R_i$ ): number of deaths summed in all 14 countries by age ( $D_i$ ) divided by age-specific standard population ( $R_i = D_i/Y_i$ ).

**Then, we define:**

$$f_{ijec} = Y_i r_{ijec}$$



to be the expected number of deaths if persons in age-group  $i$  of the standard population would have been exposed to the observed death rate in age group  $i$  during calendar-period  $p$ , level of education  $e$ , and country  $c$ ;

$$F_{pec} = \sum_j f_{iec}$$

To be the expected number of deaths for a specific calendar-period  $p$  in level of education  $e$ , and country  $c$ ;

and

$$D_p = \sum_j D_i$$

to be the expected number of deaths for a specific calendar-period  $p$  if they had standard population structure and death rates in the same age group.

Finally, the CMF for each calendar-period is given by:

$$\frac{\text{Expected deaths in standard population at death rates of period } j, \text{ education level } e, \text{ and country } c}{\text{Expected deaths in standard at standard rates}}$$
$$= \frac{F_{pec}}{D_p}$$

so that

$$CMF = \frac{F_{pec}}{D_p} = \sum_j \frac{D_i}{D_j} \frac{r_{ijec}}{R_i}$$

as CMF is the weighted arithmetic means of age-specific rate ratios.

## Appendix 5

The adjustment of overestimation in RR: Double standardization

When examining age-specific Rate Ratio (RR) between the low and high educated among each age group, we observed higher RR in younger than in older age groups. Take all-cause mortality among men as an example, RR ranges from 4.38 for the age group 30-34 to 1.95 for the age group 70-74. Similar declines in RR were also found for all-cause mortality among women and for other causes of death.

In our analysis, each cohort consisted of different age groups. This phenomenon suggested that more recently born generations, of which we observed only the younger age groups, are likely to have higher RRs simply because of the difference in age distribution. In order to mitigate this issue, we have used a 'double standardization' technique. Here we offer an example of the calculation of the 'double standardization' for all-cause mortality among men.

Say the standard population consists of age groups  $a$  to  $e$ , with person-year followed  $PY_a$  to  $PY_e$ , and all-cause deaths  $D_a$  to  $D_e$ . The mortality rates of age groups age  $a$  to  $e$  are therefore  $M_a = \frac{D_a}{PY_a}$  to  $M_e = \frac{D_e}{PY_e}$

A specific cohort we are interested only contains age  $a$  to  $c$ . For this cohort we observed  $R_{obs} = \frac{CCMF_{low\ edu}}{CCMF_{high\ edu}}$

First, we calculate age-specific RR for the standard population, that is the ratio of mortality rates between the low and high educated. From this step we get age-specific  $RR_a$  to  $RR_e$  ( $\frac{D_{low\ edu}}{PY_{low\ edu}} / \frac{D_{high\ edu}}{PY_{high\ edu}}$  for each age group).

Second, we calculate the age-standardized RR for the standard population, weighted by mortality rates of each age group in the standard population. That is

$$RR_{stand} = M_a * RR_a + M_b * RR_b + M_c * RR_c + M_d * RR_d + M_e * RR_e$$

Third, we calculate the age-standardized RR for age groups include in each cohort, similarly as the previous step but with limited age groups. That is

$$RR_{cohort} = M_a * RR_a + M_b * RR_b + M_c * RR_c$$

Finally, we take the ratio of  $RR_{cohort}$  and  $RR_{stand}$

$$por_{cohort} = \frac{RR_{cohort}}{RR_{stand}}$$

as to calculate a proportion as an effect of to what extend it is influenced by the not-complete age groups. We divide  $RI_{obs}$  by this proportion as our final estimation of the double standardized RR:

$$RR_{ds} = R_{obs} / por_{cohort}$$

The double standardization, therefore, can be simply understood as: the  $R_{obs}$  that could have been estimated if all other age groups were available.

Appendix 6

Figure 1. Changes among high-educated by birth-year: eight specific causes of death

A. Male

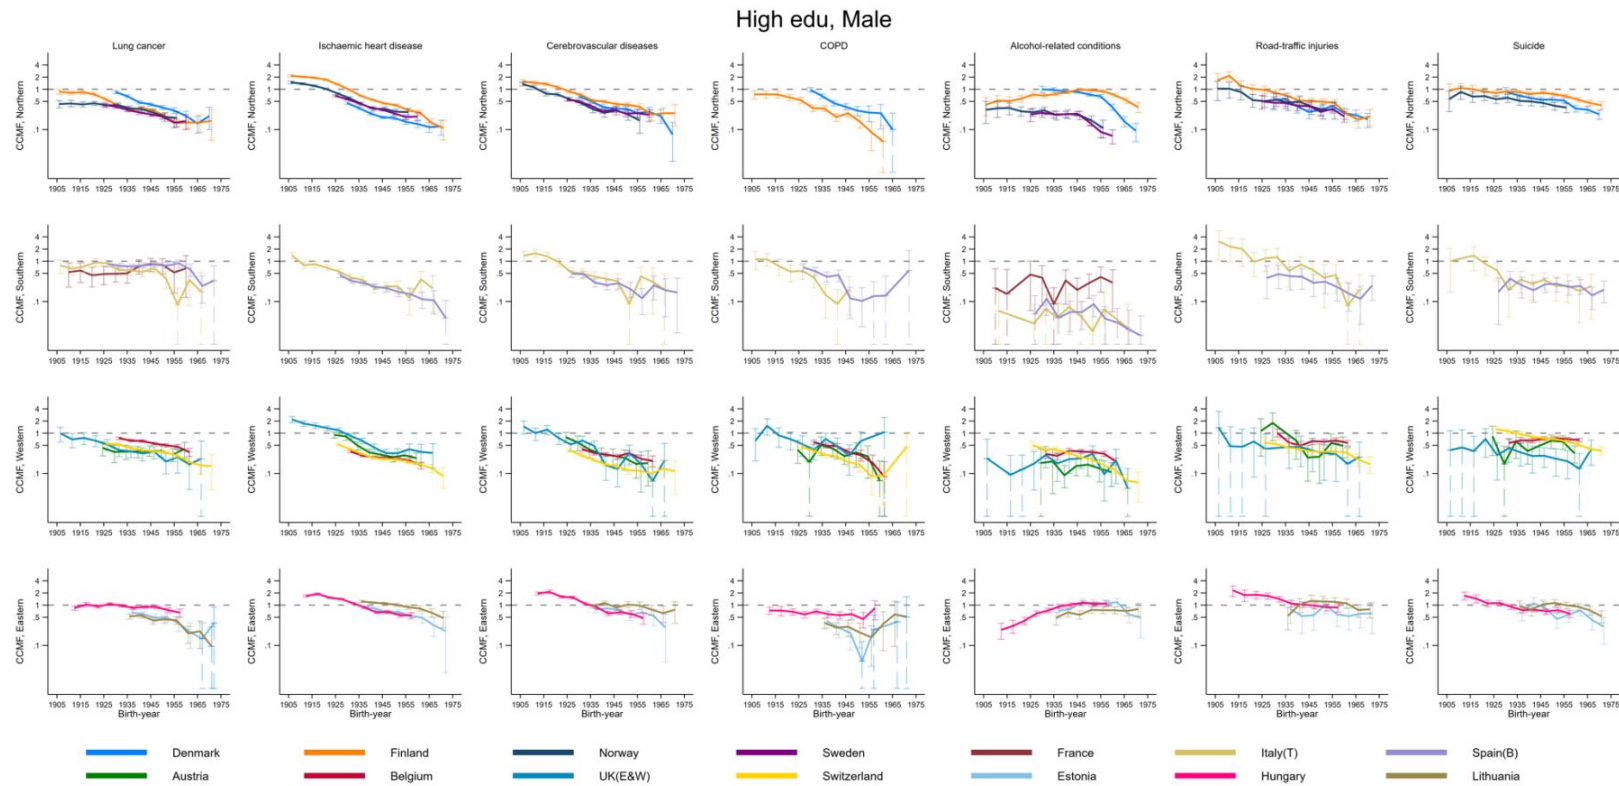

B. Female

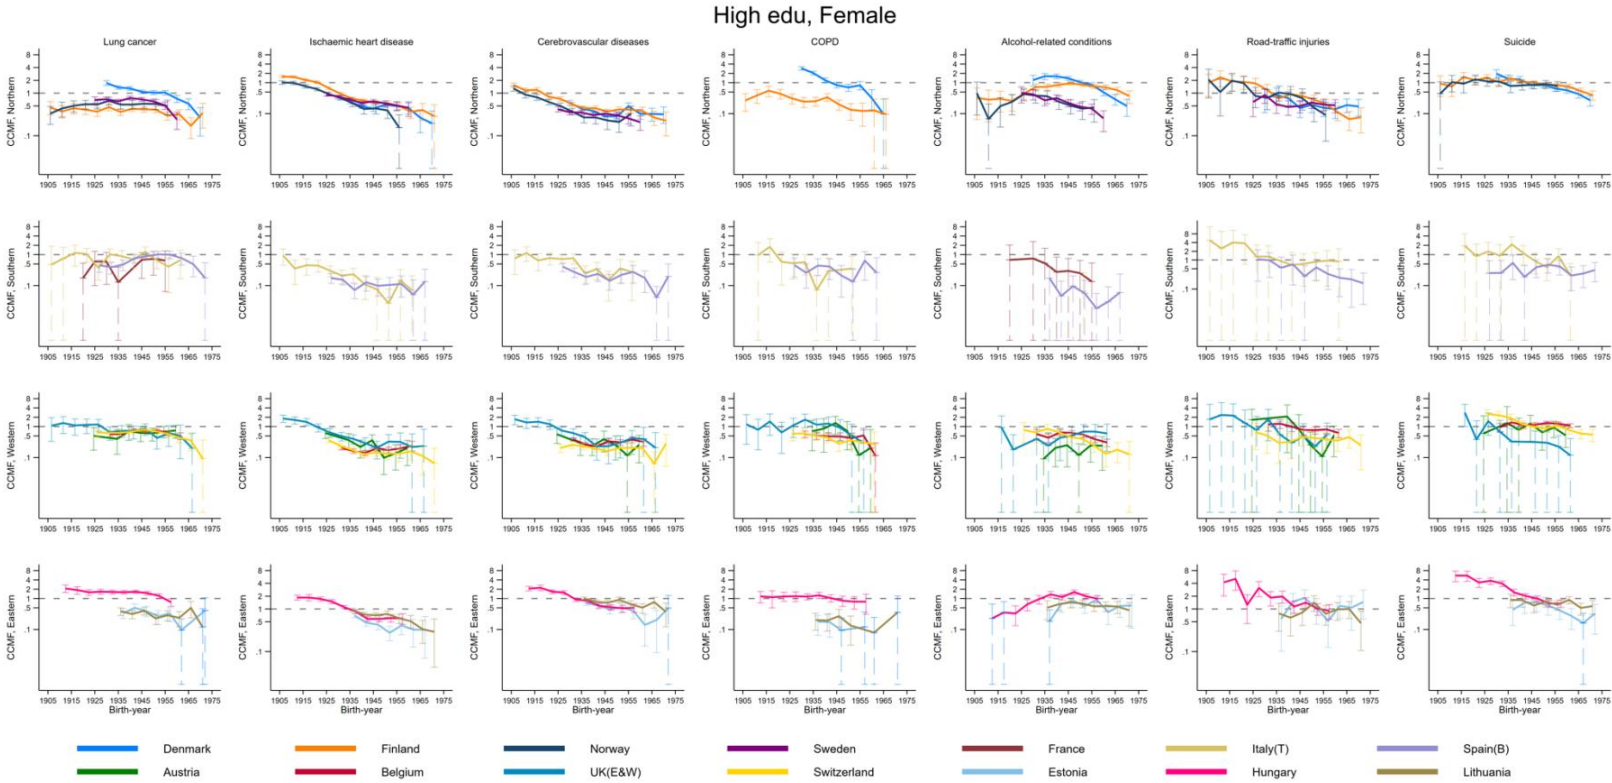

Figure 2. Changes among low-educated by birth-year: eight specific causes of death  
A. Male

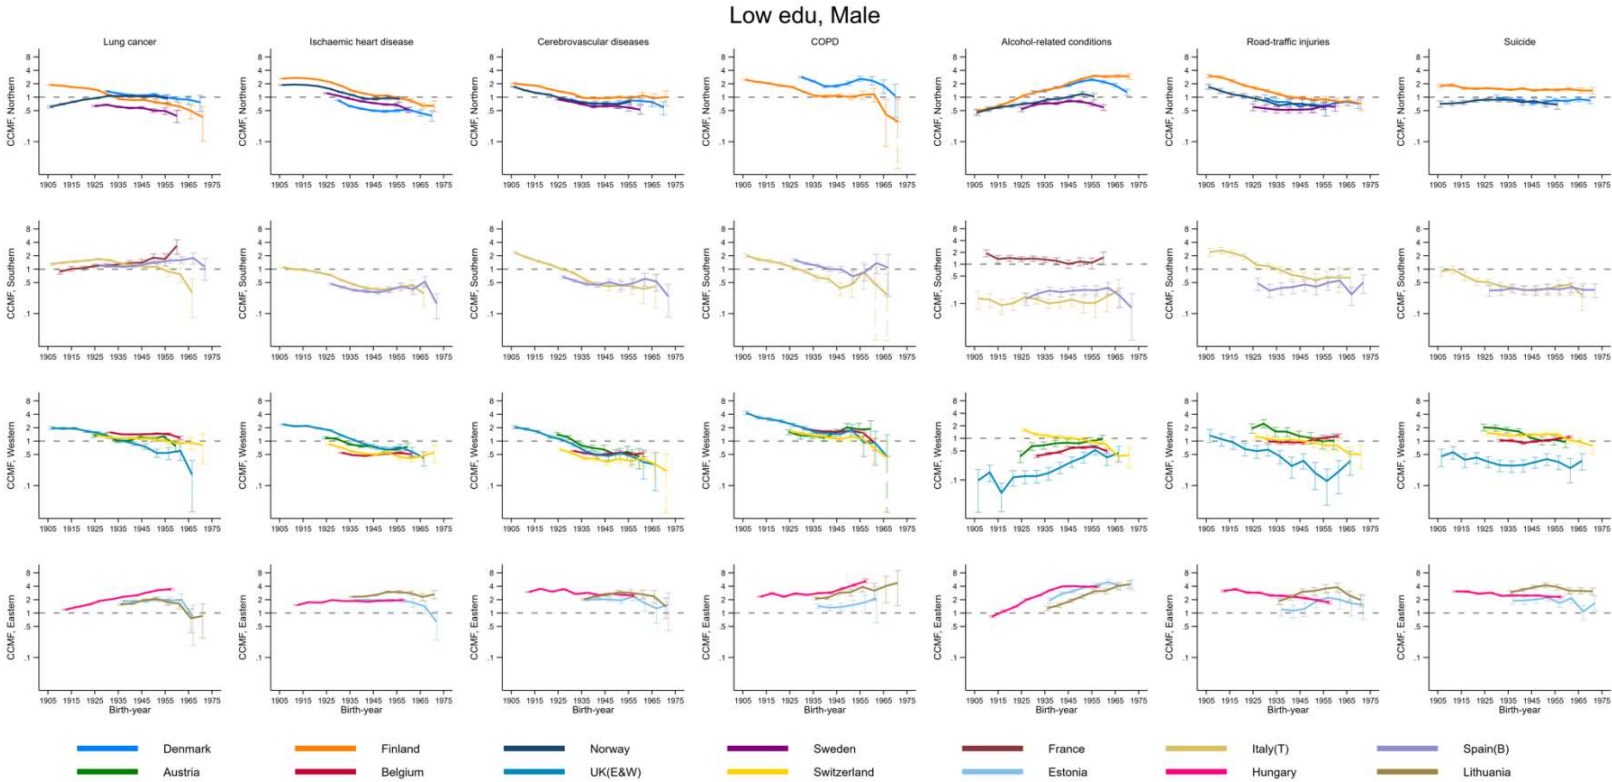

B. Female

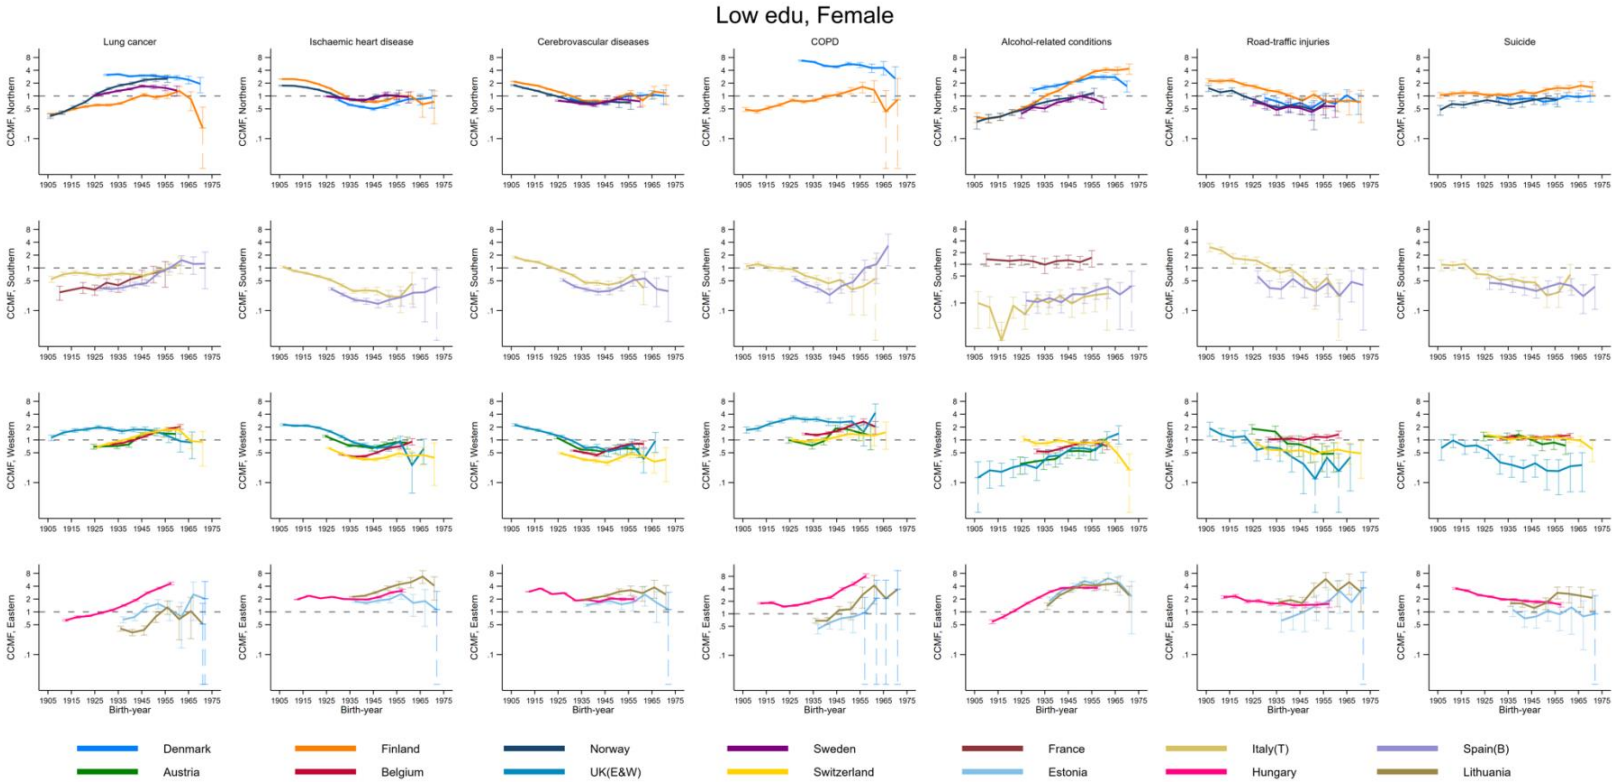

## Appendix 7

We calculated CCMF using a common standard population for both male and female. The results are in Figure 3 and 4. Because women in general have lower mortality, CCMF is often below 1, which makes it less easy to interpret educational differences, which is the focus of the paper. Nevertheless, the results on absolute and relative inequalities are very similar to the main results, because rate difference and rate ratios are not affected by the exact values of CCMFs but relative positions of CCMFs. Therefore, although in the main analysis, different standard populations are used for men and women separately, there are still certain levels of comparability to the results. We present this as supplementary material where CCMFs for men and women are based on the same standard population and therefore can be directly better compared.

Figure 3. Change in mortality by birth-year: using a common standard population for both male and female

A. Male, low educated



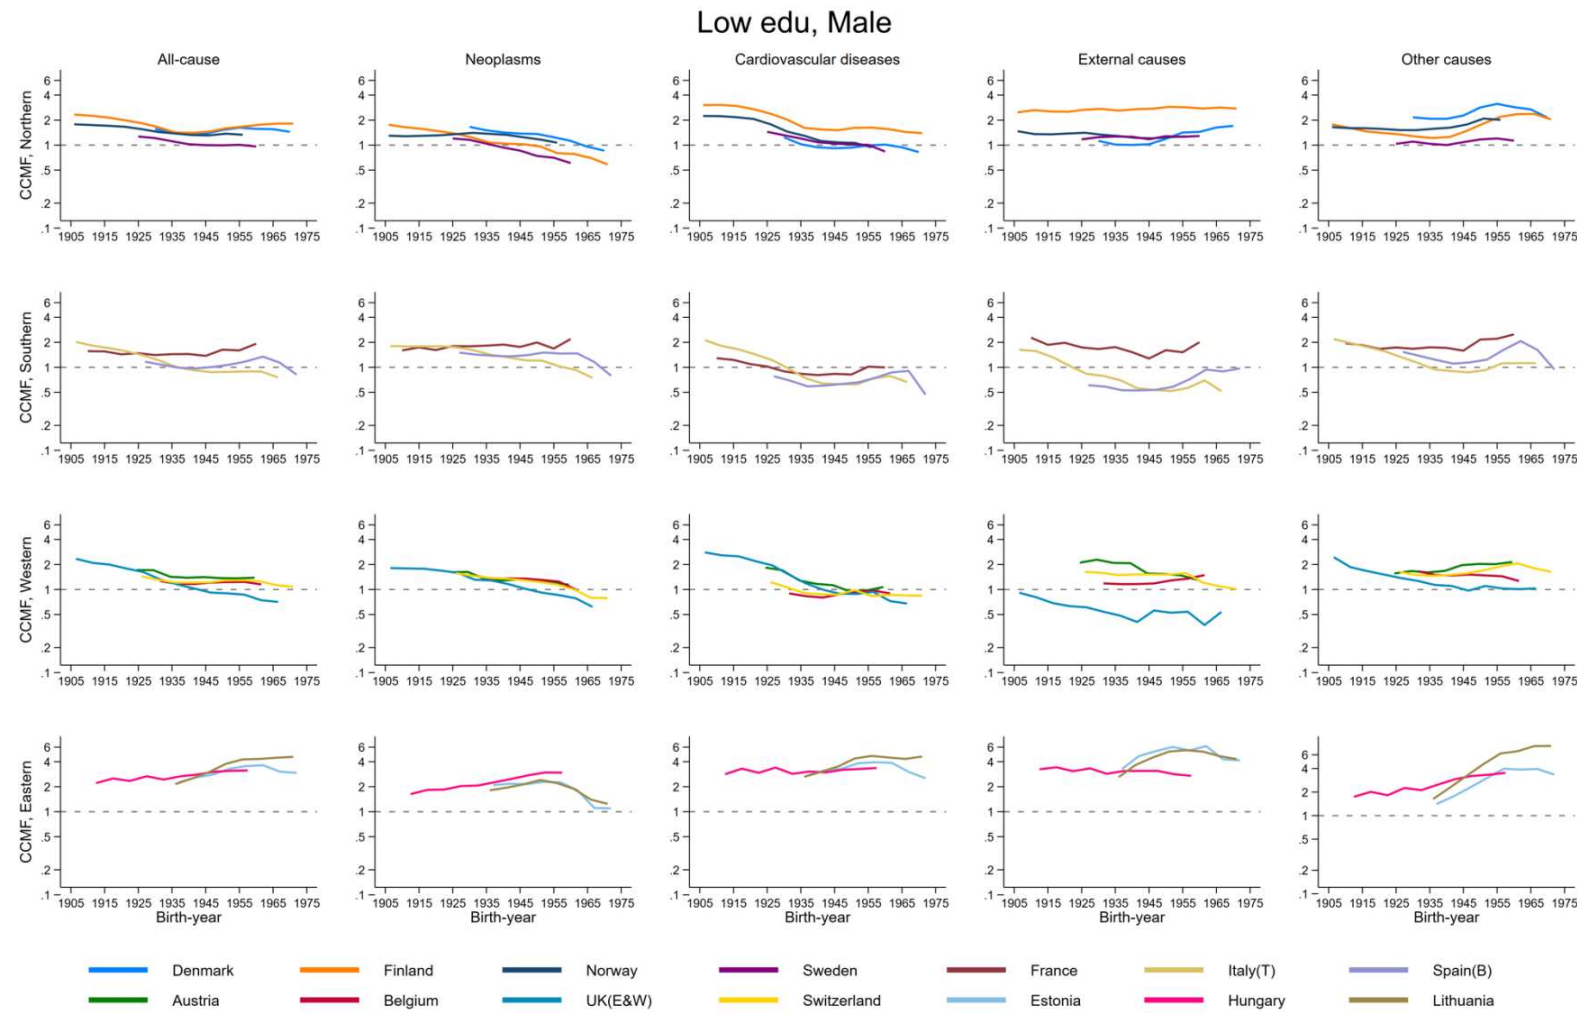

B. Female, low educated

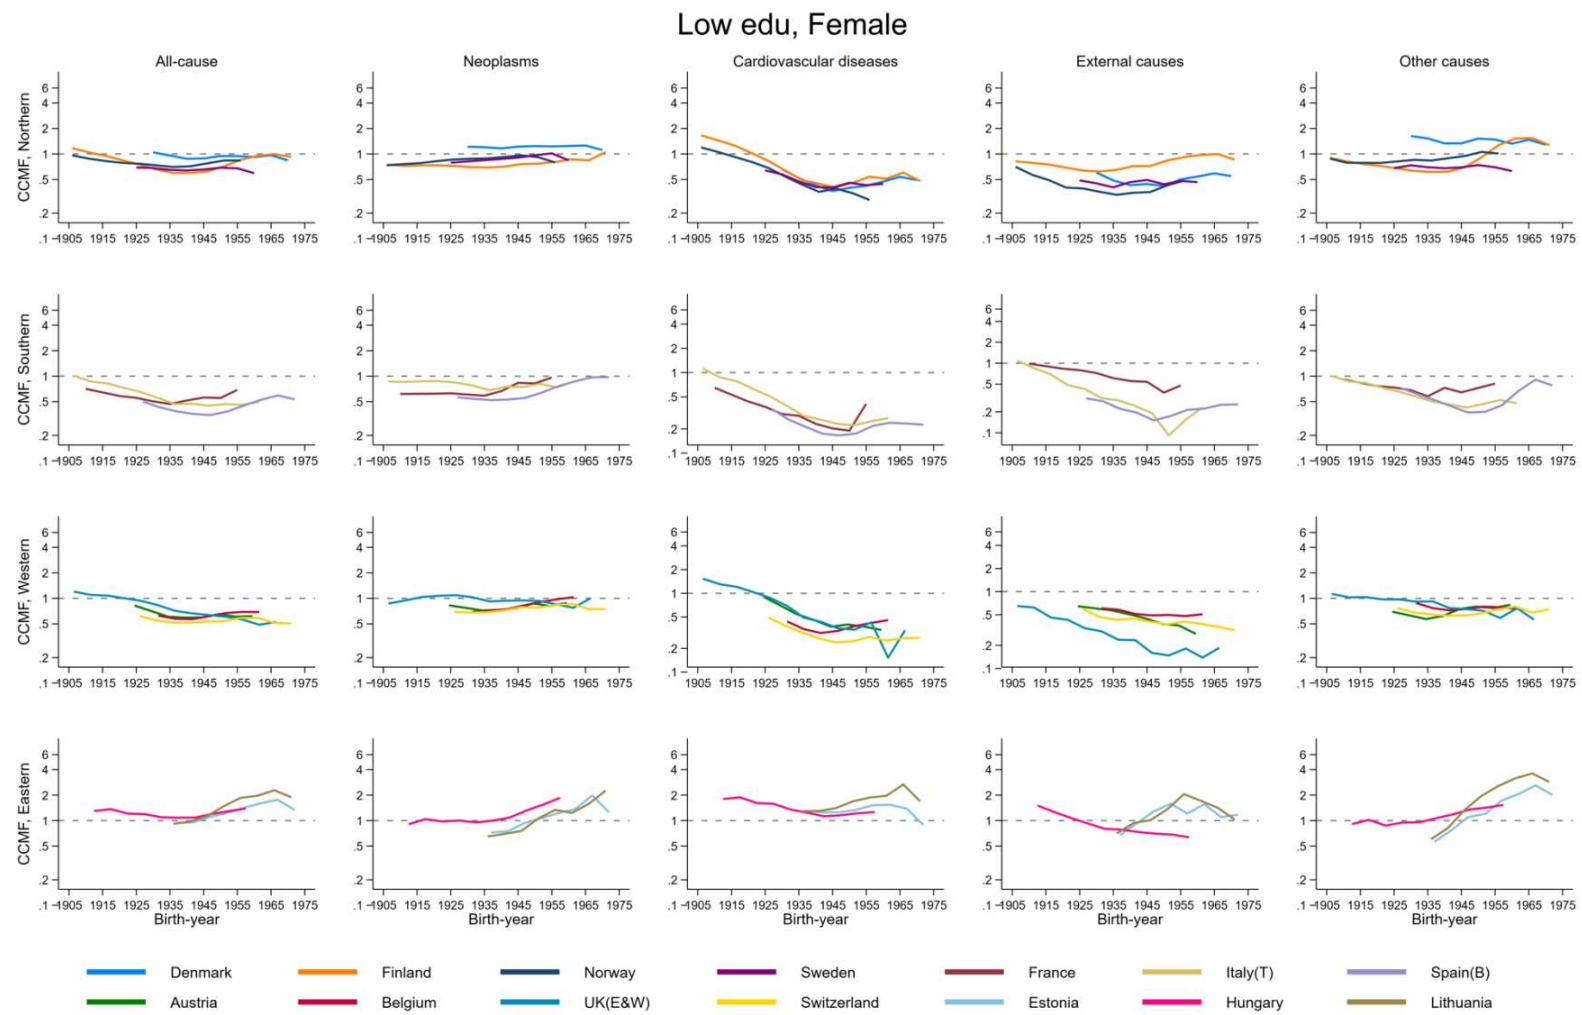

C. Male, high educated

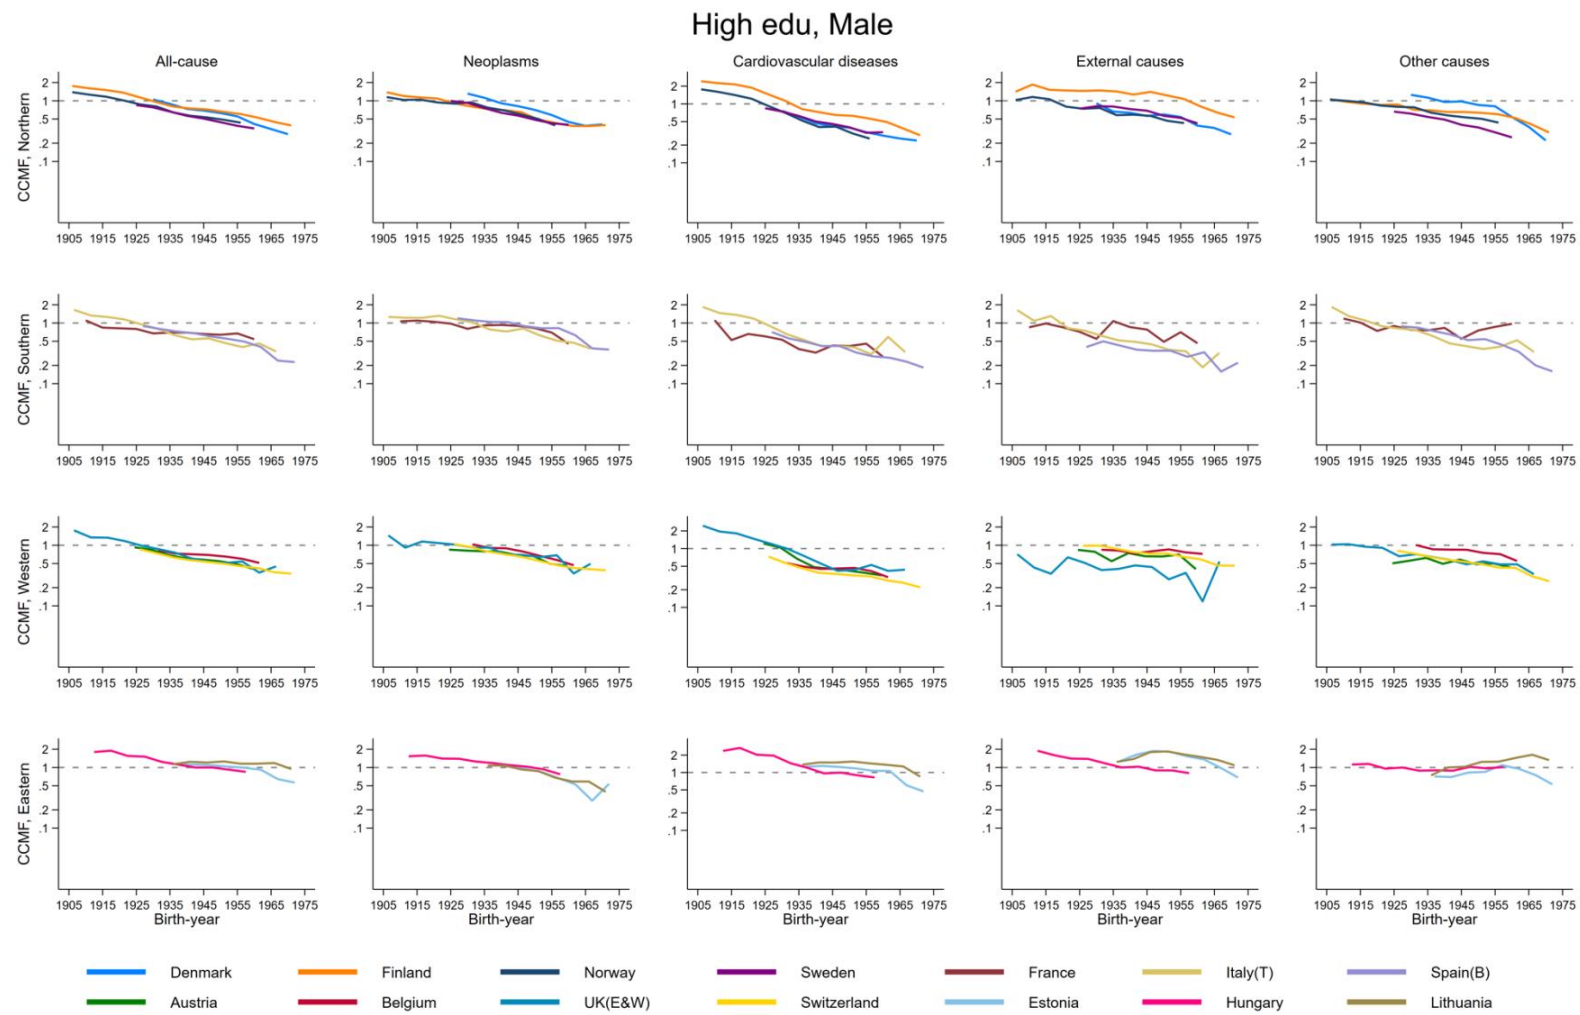

D. Female, high educated

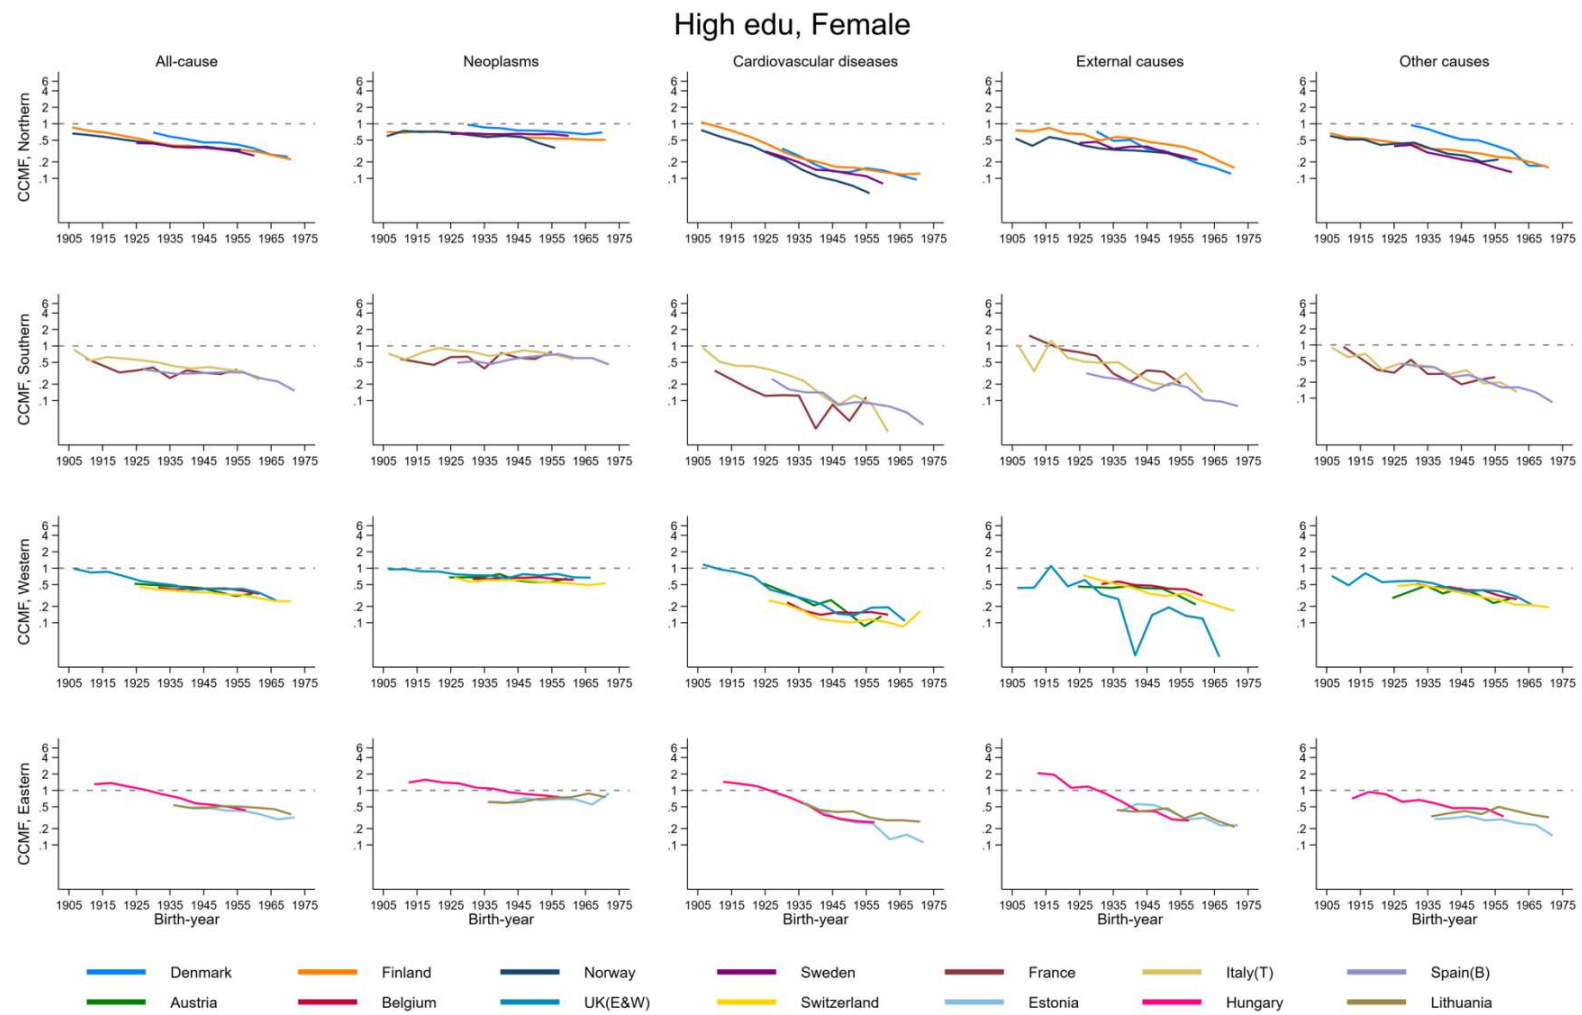

Figure 4. Changes in inequalities in all-cause mortality by period and cohort perspectives: using a common standard population for both male and female

A. Male



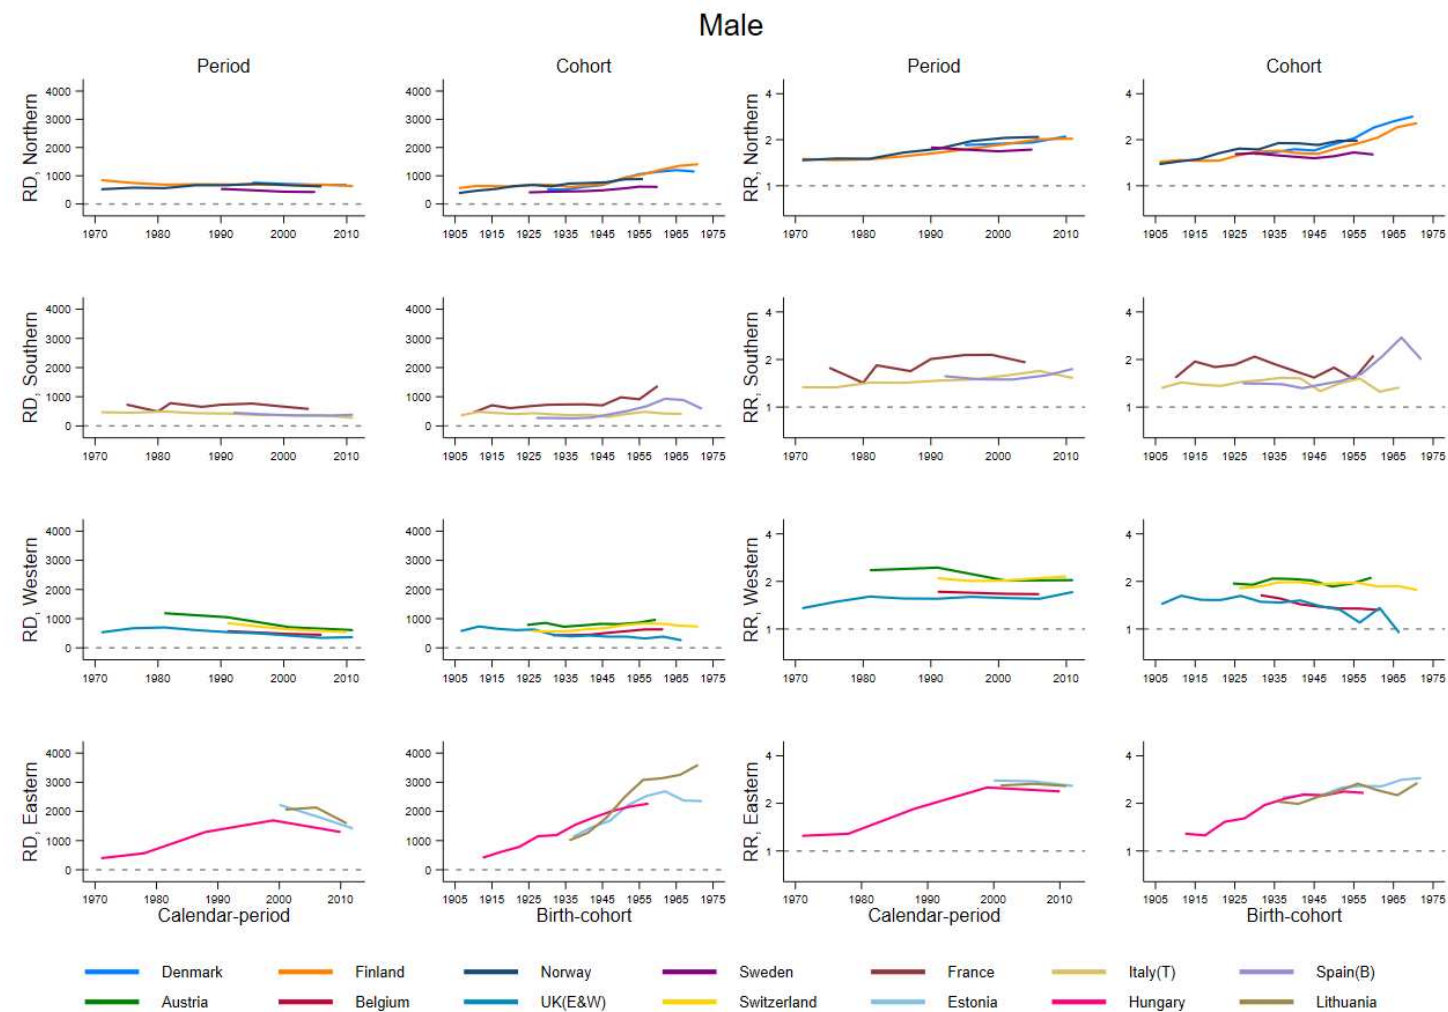

B. Female

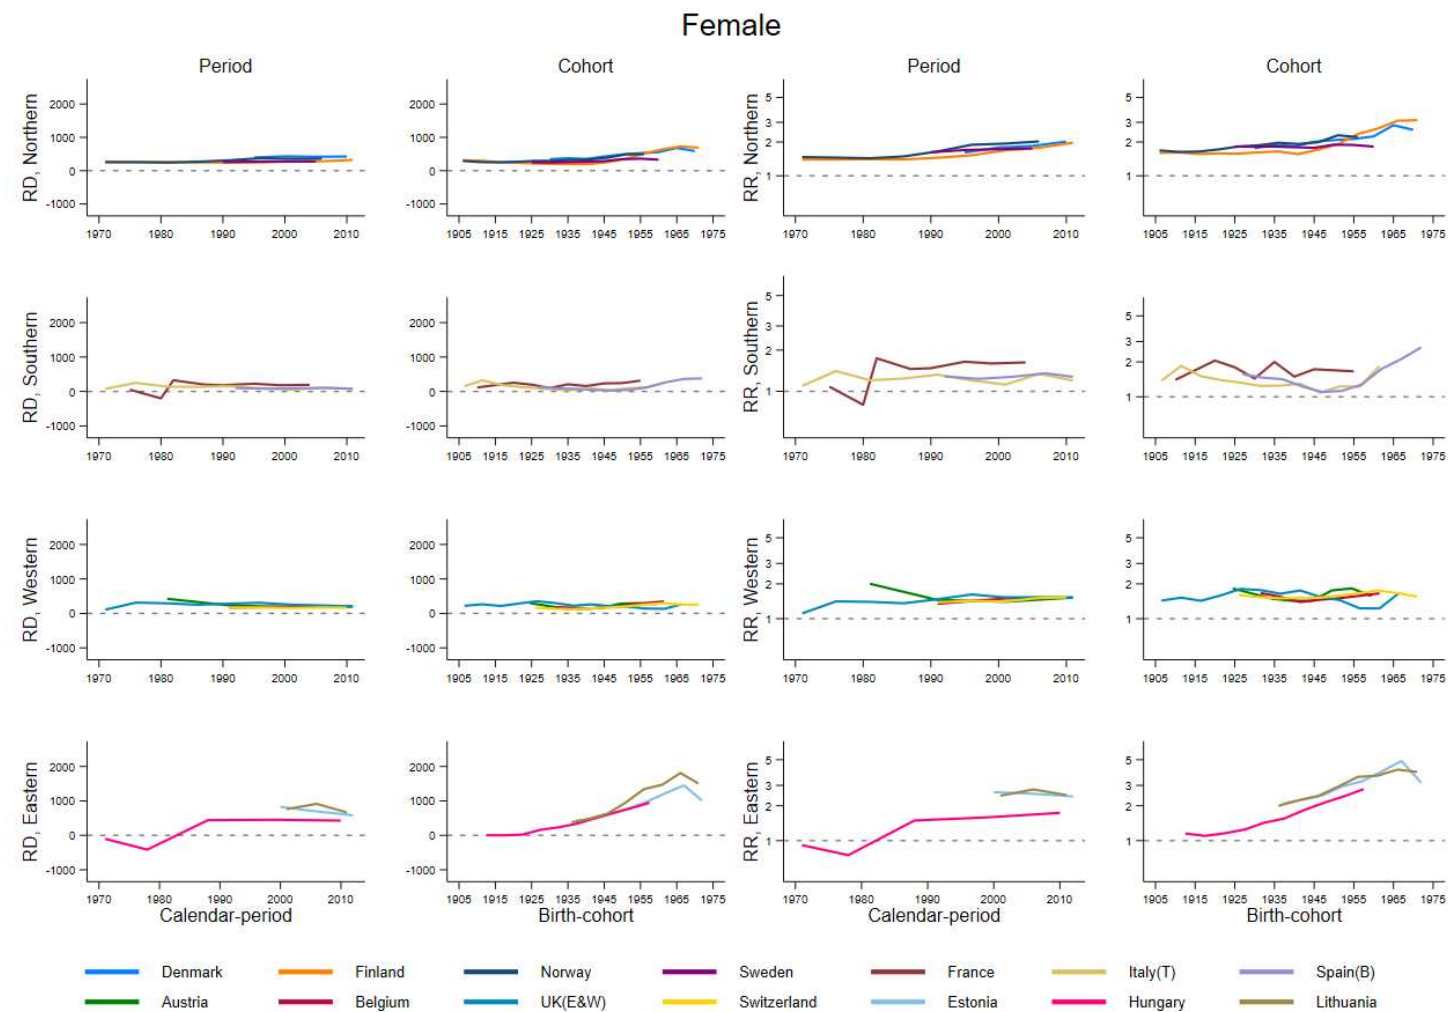

Supplement: inline-supplementary-material-1 [file inline-supplementary-material-1.pdf]
